# Supplementary material
Source: MDPI journal article supplement (https://www.mdpi.com/2071-1050/15/9/7404)
Supplement: s1 [file s1]

## SUPPLEMENTARY MATERIAL

# Phytochemical Analysis of the Aerial Parts of *Campanula pelviformis* Lam. (Campanulaceae): Documenting the Dietary Value of a Local Endemic Plant of Crete (Greece) Traditionally Used as Wild Edible Green

Olga St. Tsiftoglou <sup>1</sup>, George Lagogiannis <sup>1</sup>, Antonia Psaroudaki <sup>2</sup>,  
Aikaterina Vantsioti <sup>1</sup>, Milan N. Mitić <sup>3</sup>, Jelena M. Mrmošanin <sup>3</sup> and Diamanto Lazari <sup>1,\*</sup>

<sup>1</sup> Laboratory of Pharmacognosy, Faculty of Health Sciences, School of Pharmacy, Aristotle University of Thessaloniki, 54124 Thessaloniki, Greece

<sup>2</sup> Department of Nutrition and Dietetics, Hellenic Mediterranean University, Tripitos Area (2nd km Sitia–Palekastro), 72300 Sitia, Greece

<sup>3</sup> Department of Chemistry, Faculty of Sciences and Mathematics, University of Niš, 18000 Niš, Serbia

\* Correspondence: dlazari@pharm.auth.gr

Table S1. <sup>1</sup>H and <sup>13</sup>C NMR of compound 1 (CD<sub>3</sub>OD, 500 MHz)

| No | δ <sub>C</sub> | Type C           | δ <sub>H</sub> | H | J (Hz)           |
|----|----------------|------------------|----------------|---|------------------|
| 1  | 17.4           | CH <sub>3</sub>  | 1.80           | 3 | t (J=7.0)        |
| 2  | 143.9          | CH               | 6.33           | 1 | m                |
| 3  | 109.0          | CH               | 5.58           | 1 | m                |
| 4  | 76.7           | C                | -              | - | -                |
| 5  | 79.8           | C                | -              | - | -                |
| 6  | 71.0           | C                | -              | - | -                |
| 7  | 70.2           | C                | -              | - | -                |
| 8  | 65.1           | CH               | 4.42           | 1 | d (J=6.5)        |
| 9  | 80.4           | CH               | 4.27           | 1 | t (J=7.5)        |
| 10 | 125.2          | CH               | 5.46           | 1 | dd (J=15.5, 8.0) |
| 11 | 137.4          | CH               | 5.91           | 1 | m                |
| 12 | 28.1           | CH <sub>2</sub>  | 2.19           | 1 | s                |
| 13 | 31.6           | CH <sub>2</sub>  | 1.65           | 2 | m                |
| 14 | 60.8           | =CH <sub>2</sub> | 3.58           | 2 | t (J=6.5)        |

|     |           |                 |           |   |                  |
|-----|-----------|-----------------|-----------|---|------------------|
| 1'  | 99.3      | CH              | 4.32      | 1 | d (J=7.5)        |
| 2'  | 73.4      | CH              | 3.24      | 1 | o.s              |
| 3'  | 77.0-73.4 | CH              | 3.70-3.20 | 1 | o.s              |
| 4'  | 77.0-73.4 | CH              | 3.70-3.20 | 1 | o.s              |
| 5'  | 77.0-73.4 | CH              | 3.70-3.20 | 1 | o.s              |
| 6'a | 61.3      | CH <sub>2</sub> | 3.76      | 1 | br d (J=12.0)    |
| 6'b |           |                 | 3.38      | 1 | dd (J=12.0, 6.0) |

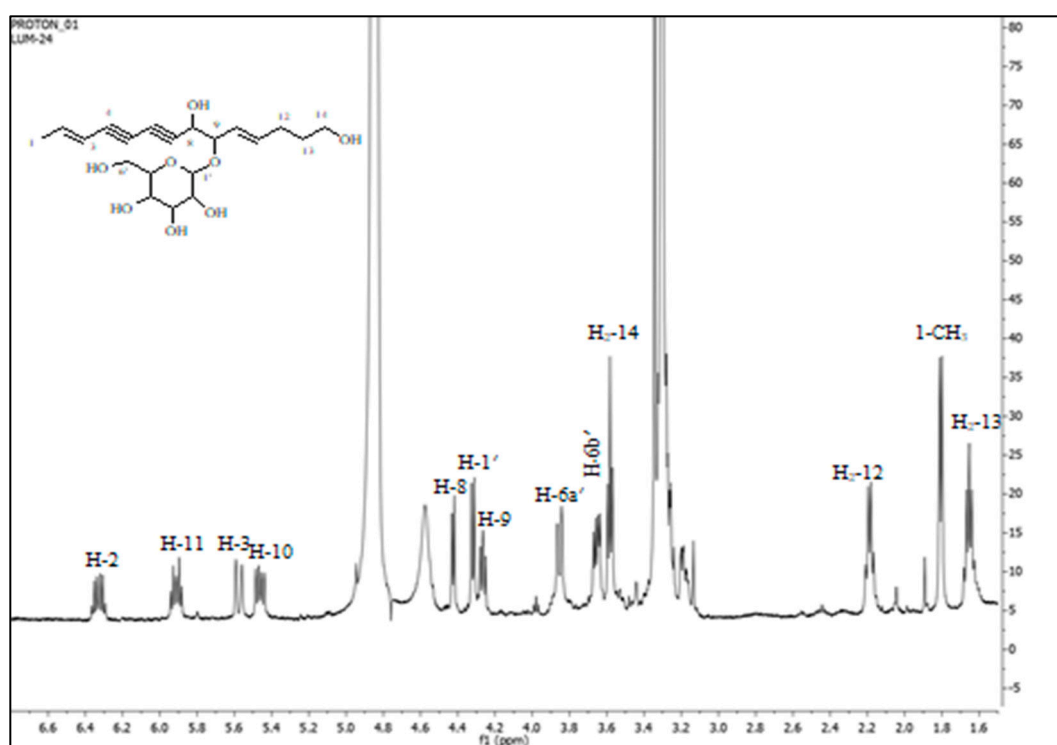

Figure S1. <sup>1</sup>H-NMR spectrum of compound 1 (CD<sub>3</sub>OH 500MHz)

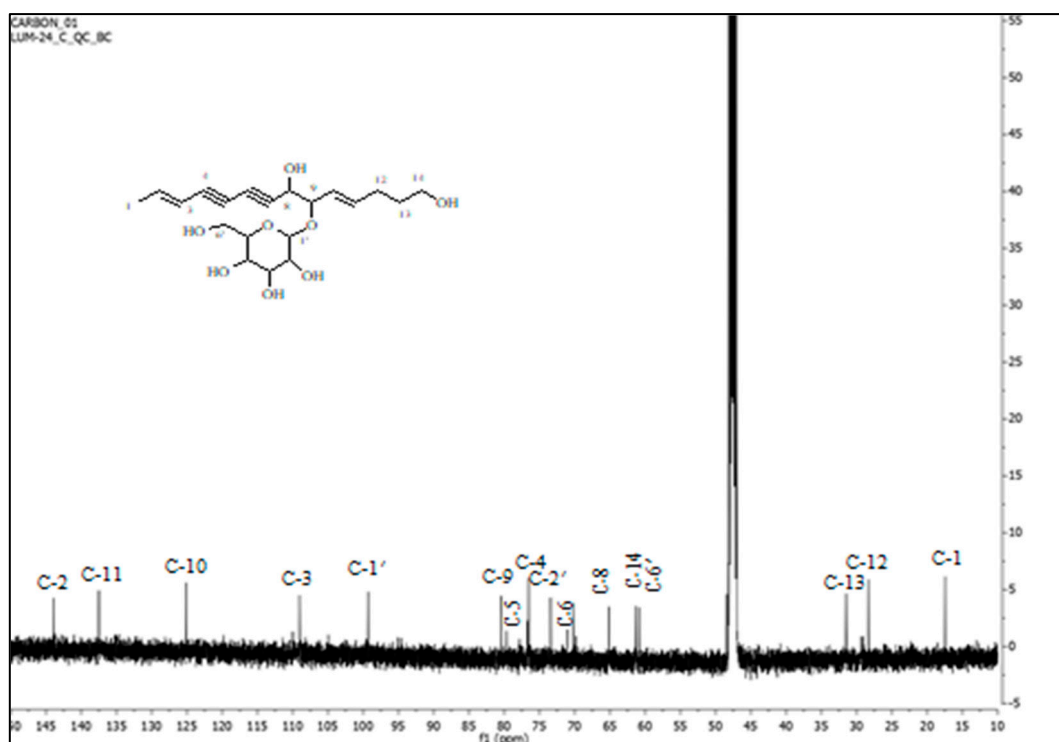

Figure S2.  $^{13}\text{C}$ -NMR spectrum of compound 1 ( $\text{CD}_3\text{OD}$ , 125MHz)

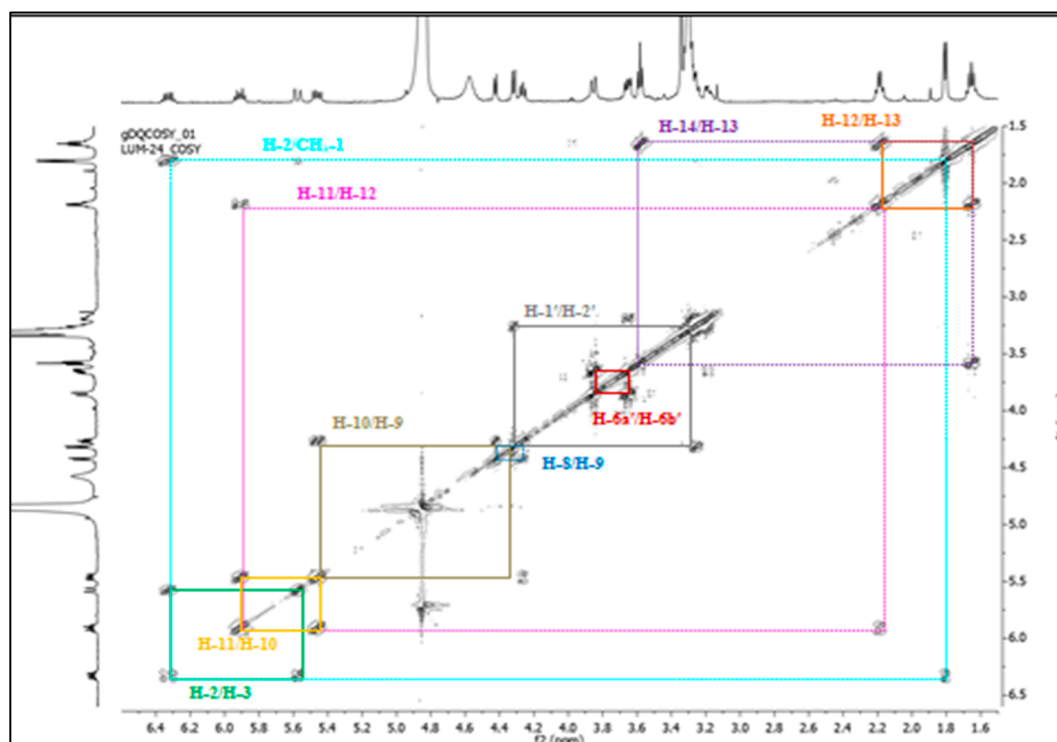

Figure S3. gDQCOSY spectrum of compound 1 ( $\text{CD}_3\text{OD}$ , 500 MHz)

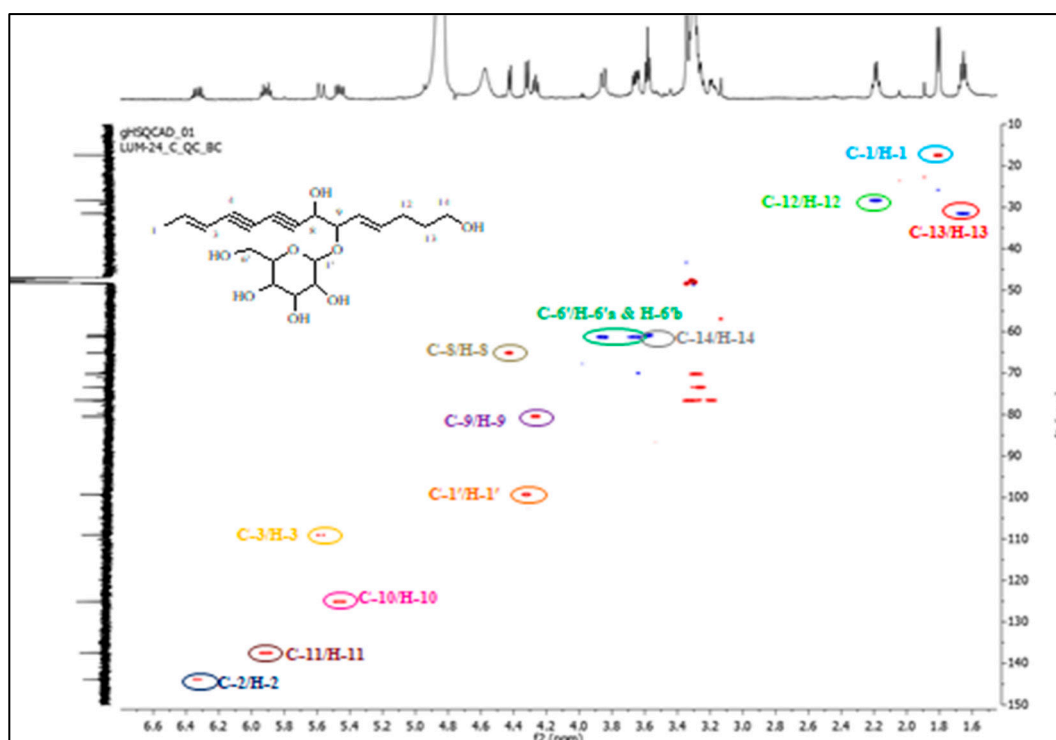

Figure S4. gHSQCAD spectrum of compound 1 (CD<sub>3</sub>OD, 500 MHz)

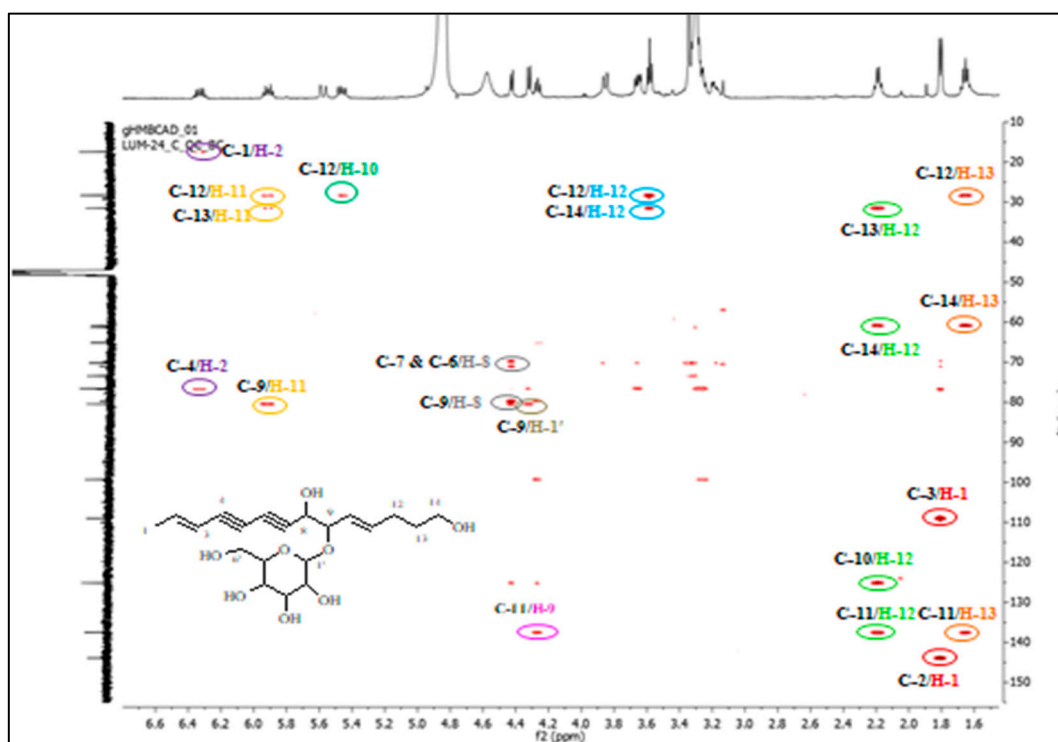

Figure S5. gHMBCAD spectrum of compound 1 (CD<sub>3</sub>OD, 500 MHz)

**Table S2.**  $^1\text{H}$  and  $^{13}\text{C}$  NMR of compound **2** ( $\text{CD}_3\text{OD}$ , 500 MHz)

| No   | $\delta_{\text{C}}$ | Type C         | $\delta_{\text{H}}$ | H | J (Hz)            |
|------|---------------------|----------------|---------------------|---|-------------------|
| 1a   | 114.7               | $=\text{CH}_2$ | 5.21                | 1 | d (J=17.5)        |
| 1b   |                     |                | 5.10                | 1 | d (J=10.5)        |
| 2    | 139.5               | CH             | 5.86                | 1 | dd (J=17.5, 10.5) |
| 3    | 81.4                | CH             | 4.12                | 1 | m                 |
| 4a   | 34.3                | $\text{CH}_2$  | 1.65                | 1 | m                 |
| 4b   |                     |                | 1.54                | 1 | m                 |
| 5    | 24.2                | $\text{CH}_2$  | -                   | 2 | o.s               |
| 6    | 31.6                | $\text{CH}_2$  | -                   | 2 | o.s               |
| 7    | 22.2                | $\text{CH}_3$  | -                   | 3 | o.s               |
| 8    | 12.9                | CH             | 4.42                | 1 | d (J=6.5)         |
| 1'   | 101.9               | CH             | 4.30                | 1 | d (J=7.5)         |
| 2'   | 70.9                | CH             | 3.57                | 1 | o.s               |
| 3'   | 76.6-70.2           | CH             | 3.52-3.18           | 1 | o.s               |
| 4'   | 76.6-70.2           | CH             | 3.52-3.18           | 1 | o.s               |
| 5'   | 76.6-70.2           | CH             | 3.52-3.18           | 1 | o.s               |
| 6'a  | 67.7                | $\text{CH}_2$  | 4.02                | 1 | dd (J=11.5, 2.0)  |
| 6'b  |                     |                | 3.70                | 1 | dd (J=11.5, 4.5)  |
| 1''  | 103.4               | CH             | 4.32                | 1 | d (J=7.5)         |
| 2''  | 73.6                | CH             | 3.18                | 1 | o.s               |
| 3''  | 76.6                | CH             | 3.33                | 1 | o.s               |
| 4''  | 76.6-70.2           | CH             | 3.52-3.18           | 1 | o.s               |
| 5''  | 76.6-70.2           | CH             | 3.52-3.18           | 1 | o.s               |
| 6''a | 65.0                | $\text{CH}_2$  | 3.85                | 1 | dd (J=12.5, 3.5)  |
| 6''b |                     |                | 3.53                | 1 | dd (J=11.5, 2.0)  |

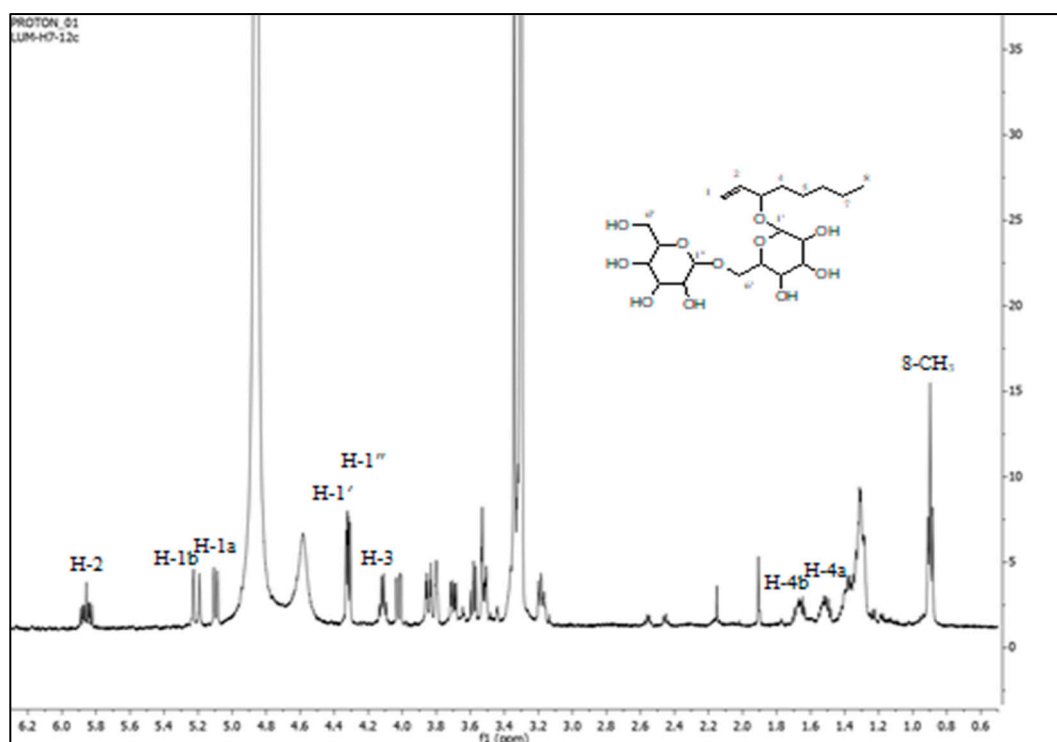

Figure S6. <sup>1</sup>H-NMR spectrum of compound 2 (CD<sub>3</sub>OH, 500MHz)

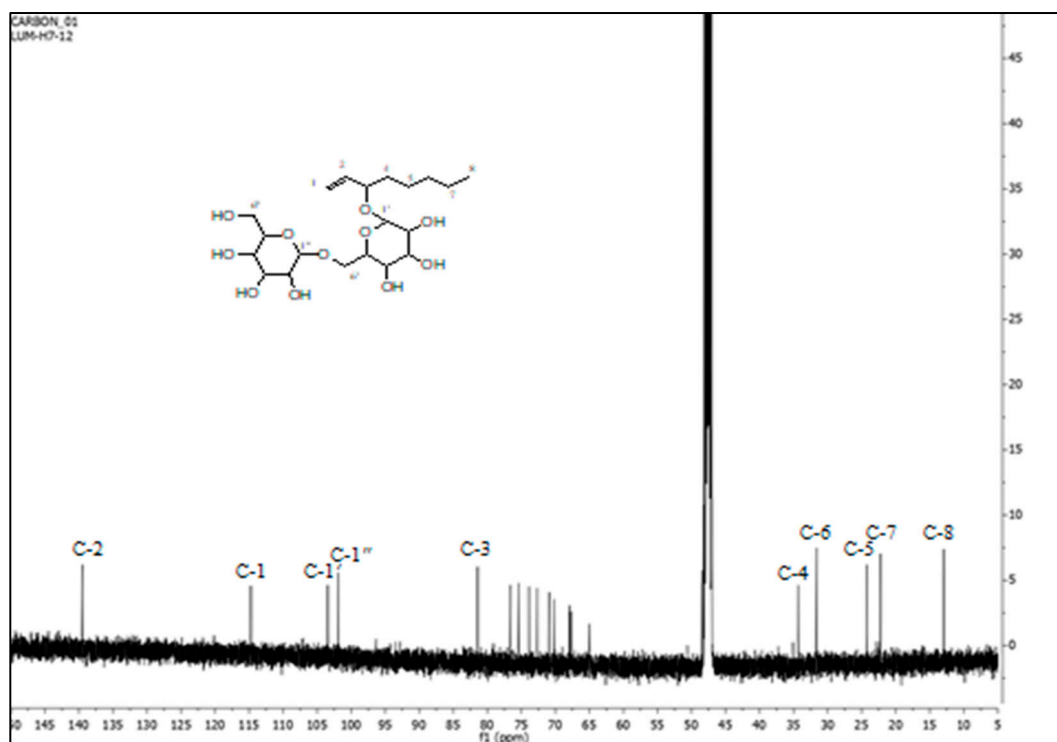

Figure S7. <sup>13</sup>C-NMR spectrum of compound 2 (CD<sub>3</sub>OD, 125MHz)

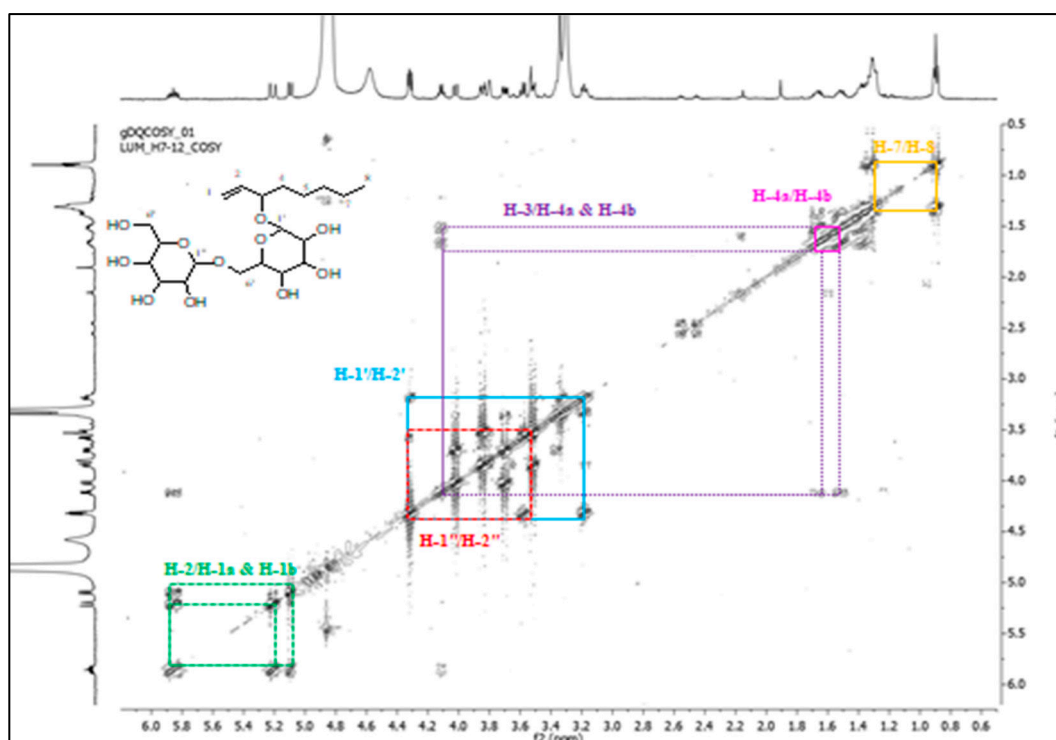

Figure S8. gDQCOSY spectrum of compound 2 (CD<sub>3</sub>OD, 500 MHz)

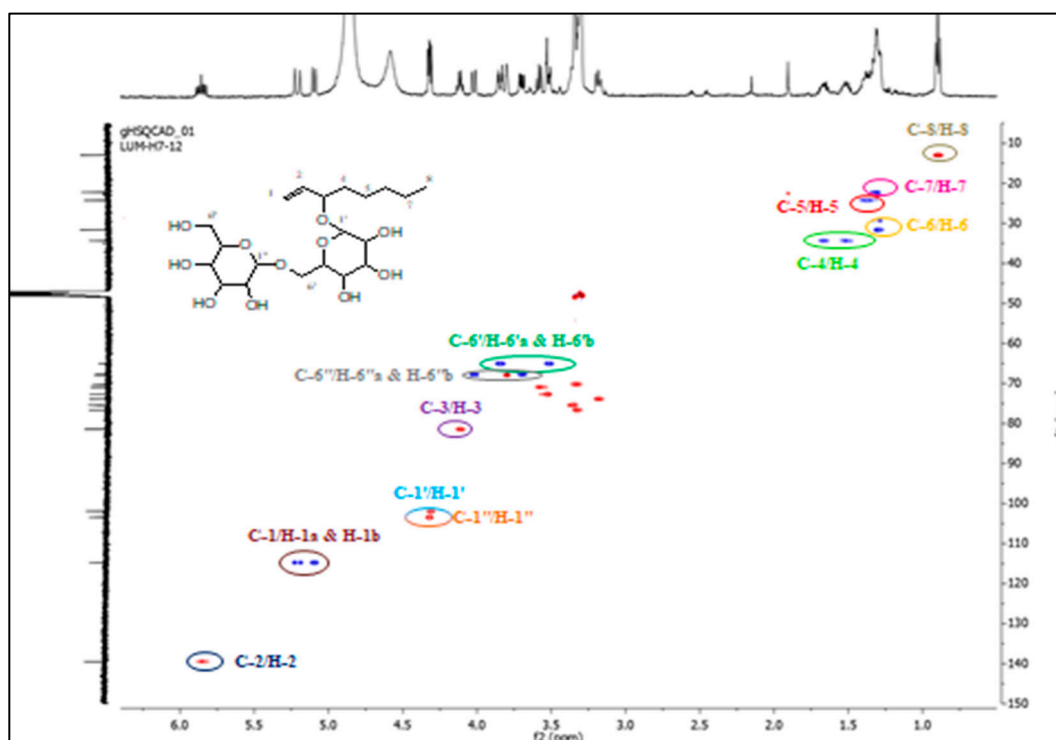

Figure S9. gHSQCAD spectrum of compound 2 (CD<sub>3</sub>OD, 500 MHz)

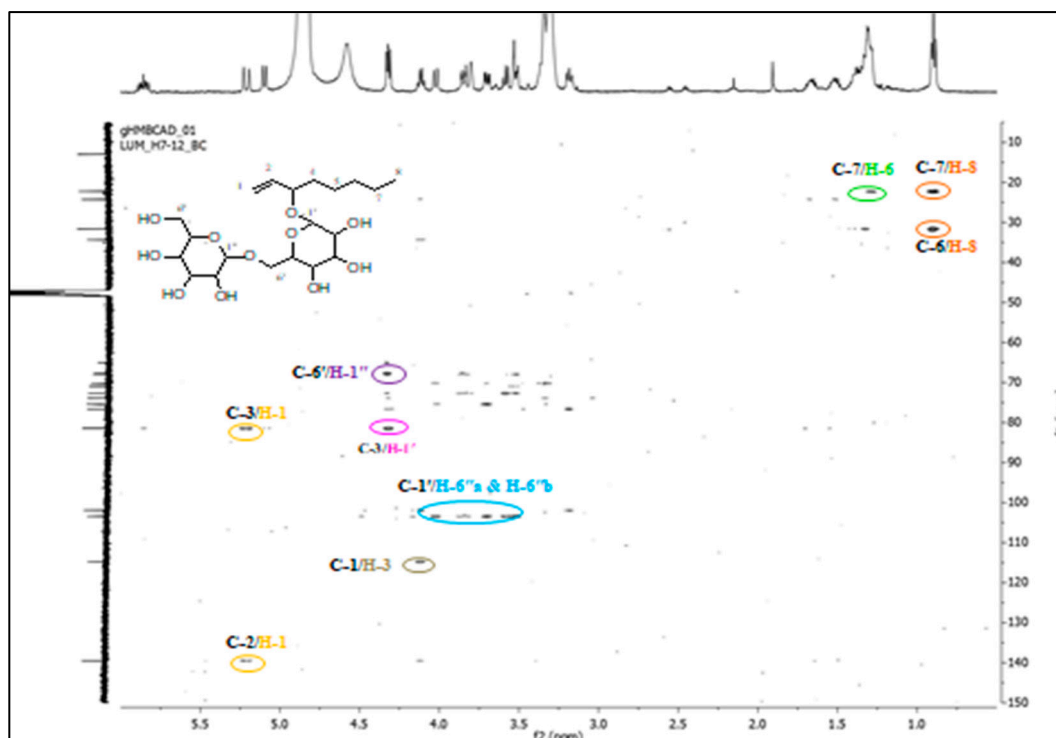

Figure S10. gHMBCAD spectrum of compound **2** (CD<sub>3</sub>OD, 500 MHz)

Table S3. <sup>1</sup>H and <sup>13</sup>C NMR of compound **3** (CD<sub>3</sub>OD, 500 MHz)

| No  | δ <sub>C</sub> | Type C          | δ <sub>H</sub> | H | J (Hz)           |
|-----|----------------|-----------------|----------------|---|------------------|
| 1   | 134.4          | C               | -              | - | -                |
| 2   | 101.9          | CH              | 6.60           | 1 | s                |
| 3   | 152.8          | C-OH            | -              | - | -                |
| 4   | 133.3          | C-OH            | -              | - | -                |
| 5   | 150.4          | C-OH            | -              | - | -                |
| 6   | 107.2          | CH              | 6.58           | 1 | s                |
| α   | 62.1           | CH <sub>2</sub> | 4.20           | 2 | d (J=5.5)        |
| β   | 128.5          | CH              | 6.27           | 1 | dd (J=16.0, 5.5) |
| γ   | 129.9          | CH              | 6.48           | 1 | d (J=16.0)       |
| 1'  | 105.3          | CH              | 4.67           | 1 | d (J=7.5)        |
| 2'  | 76.2           | CH              | 3.11           | 1 | o.s              |
| 3'  | 73.9           | CH              | 3.50           | 1 | o.s              |
| 4'  | 69.4           | CH              | 3.43           | 1 | o.s              |
| 5'  | 76.9           | CH              | 3.20           | 1 | d (J=7.5)        |
| 6'a | 60.6           | CH <sub>2</sub> | 3.80           | 1 | o.s              |
| 6'b |                |                 | 3.68           | 1 | o.s              |



|                   |      |                 |      |   |   |
|-------------------|------|-----------------|------|---|---|
| -OCH <sub>3</sub> | 55.3 | CH <sub>3</sub> | 3.84 | 3 | s |
|-------------------|------|-----------------|------|---|---|

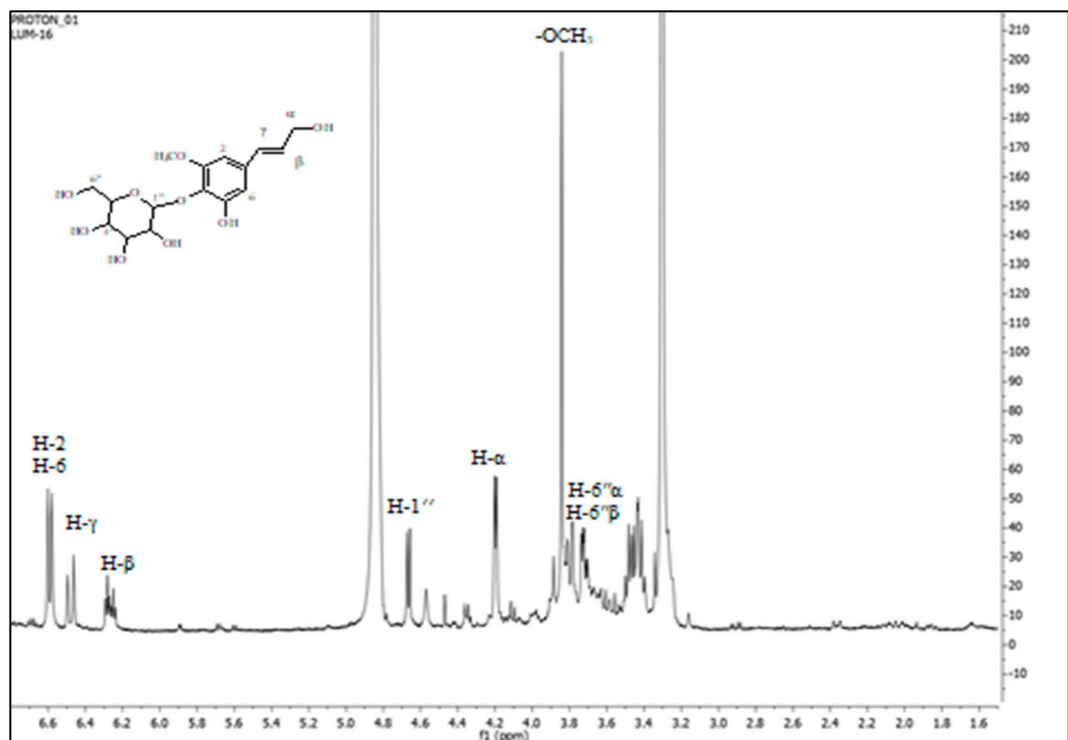

Figure S11. <sup>1</sup>H-NMR spectrum of compound 3 (CD<sub>3</sub>OD, 500 MHz)

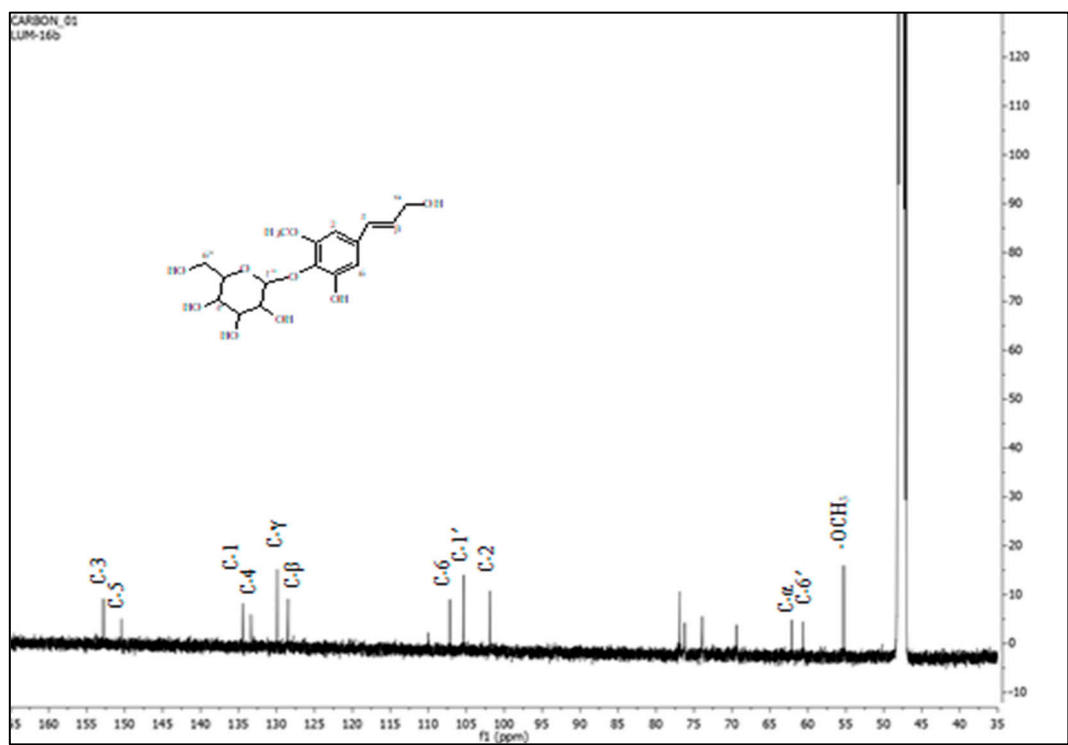

Figure S12. <sup>13</sup>C-NMR spectrum of compound 3 (CD<sub>3</sub>OD, 125 MHz)

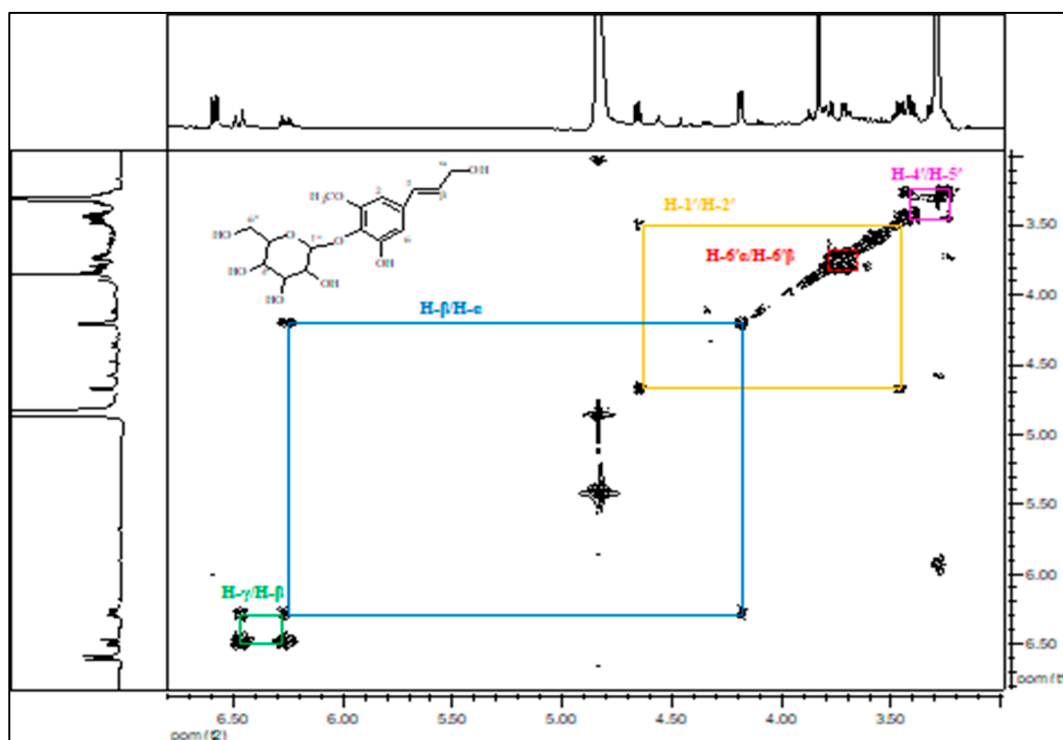

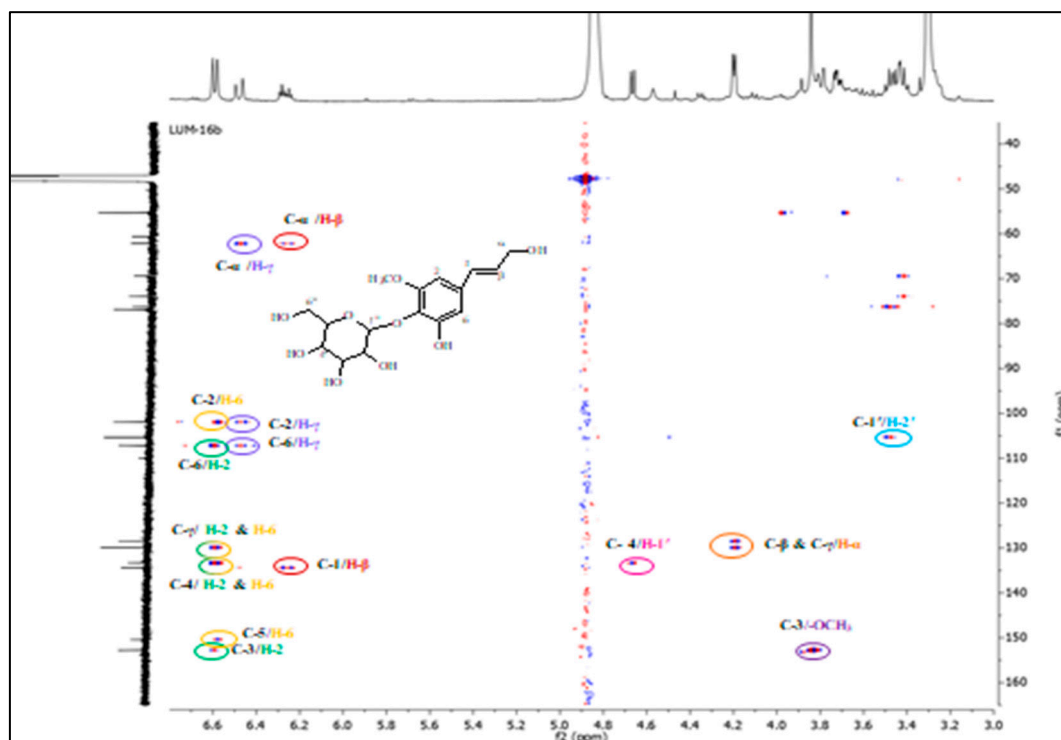

Figure S15. gHMBCAD spectrum of compound 3 (CD<sub>3</sub>OD, 500 MHz)

Table S4. <sup>1</sup>H and <sup>13</sup>C NMR of compound 4 (CD<sub>3</sub>OD, 500 MHz)

| No  | δ <sub>C</sub> | Type C          | δ <sub>H</sub> | H | (Hz)             |
|-----|----------------|-----------------|----------------|---|------------------|
| 1   | 133.7          | C               | -              | - | -                |
| 2   | 102.1          | CH              | 6.61           | 1 | s                |
| 3   | 152.8          | C-OH            | -              | - | -                |
| 4   | 133.7          | C-OH            | -              | - | -                |
| 5   | 150.5          | C-OH            | -              | - | -                |
| 6   | 107.4          | CH              | 6.60           | 1 | s                |
| α   | 64.6           | CH <sub>2</sub> | 4.71           | 2 | d (J=6.5)        |
| β   | 122.9          | CH              | 6.24           | 1 | dd (J=16.0, 7.5) |
| γ   | 133.3          | CH              | 6.56           | 1 | d (J=16.0)       |
| 1'  | 175.0          | C               | -              | - | -                |
| 2'a | 45.1           | CH <sub>2</sub> | 2.58           | 1 | d (J=15.5)       |
| 2'b |                |                 | 2.70           | 1 | s                |
| 3'  | 69.4           | C               | -              | - | -                |
| 4'a | 45.1           | CH <sub>2</sub> | 2.70           | 1 | s                |
| 4'b |                |                 | 2.63           | 1 | d (J=15.5)       |

|                   |       |                 |      |   |                  |
|-------------------|-------|-----------------|------|---|------------------|
| 5'                | 171.1 | CH              | 6.87 | 1 | d (J=7.5)        |
| 6'                | 26.4  | CH <sub>3</sub> | 1.37 | 3 | s                |
| 1''               | 105.3 | CH              | 4.68 | 1 | d (J=8.0)        |
| 2''               | 73.9  | CH              | 3.48 | 1 | o.s              |
| 3''               | 76.2  | CH              | 3.42 | 1 | o.s              |
| 4''               | 69.4  | CH              | 3.45 | 1 | o.s              |
| 5''               | 76.9  | CH              | 3.25 | 1 | o.s              |
| 6''a              | 60.6  | CH <sub>2</sub> | 3.80 | 1 | dd (J=12.0, 1.5) |
| 6''b              |       |                 | 3.72 | 1 | dd (J=12.0, 4.5) |
| -OCH <sub>3</sub> | 55.3  | CH <sub>3</sub> | 3.84 | 3 | s                |

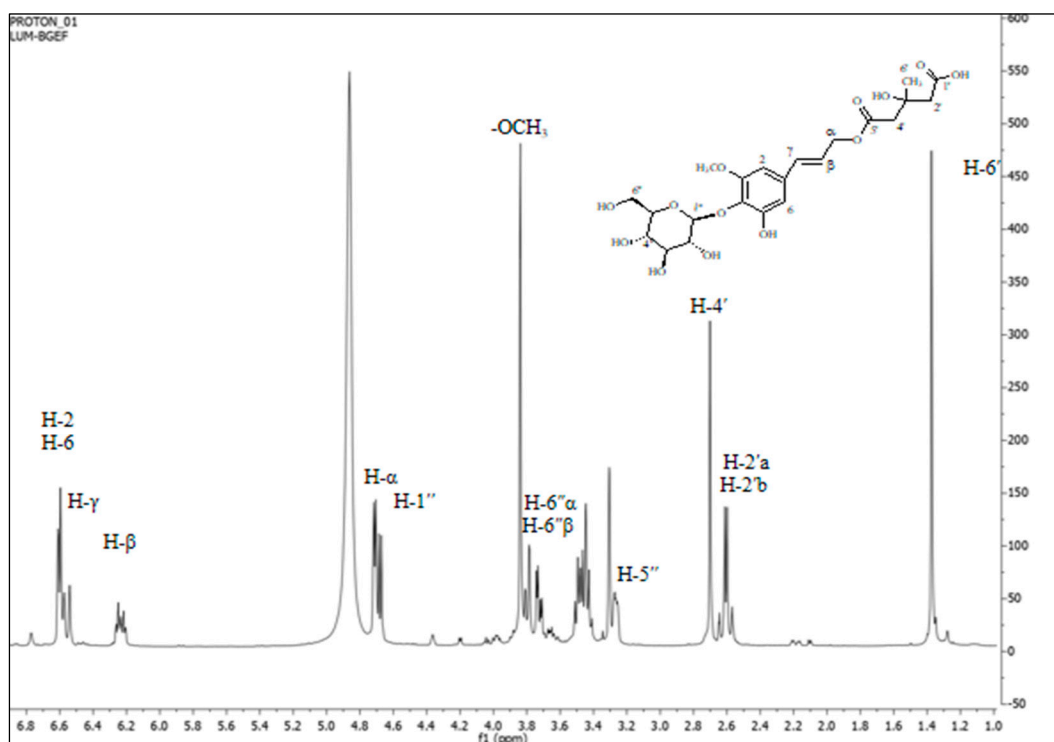

**Figure S16.** <sup>1</sup>H-NMR spectrum of compound 4 (CD<sub>3</sub>OD, 500 MHz)

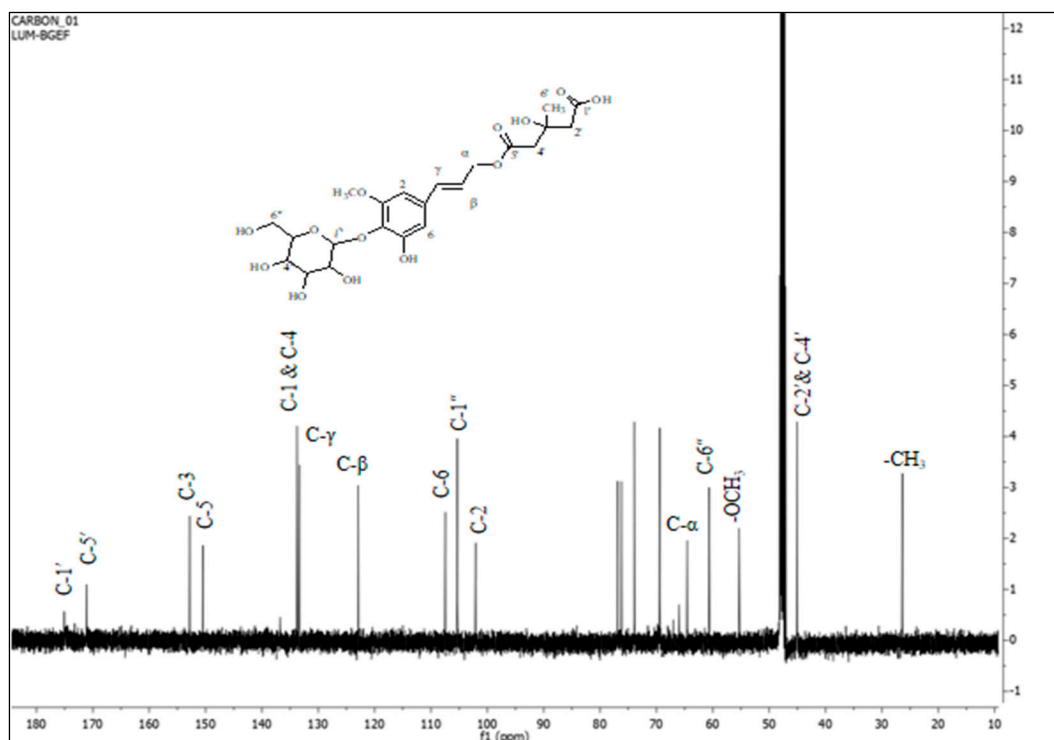

Figure S17. <sup>13</sup>C-NMR spectrum of compound 4 (CD<sub>3</sub>OD, 125 MHz)

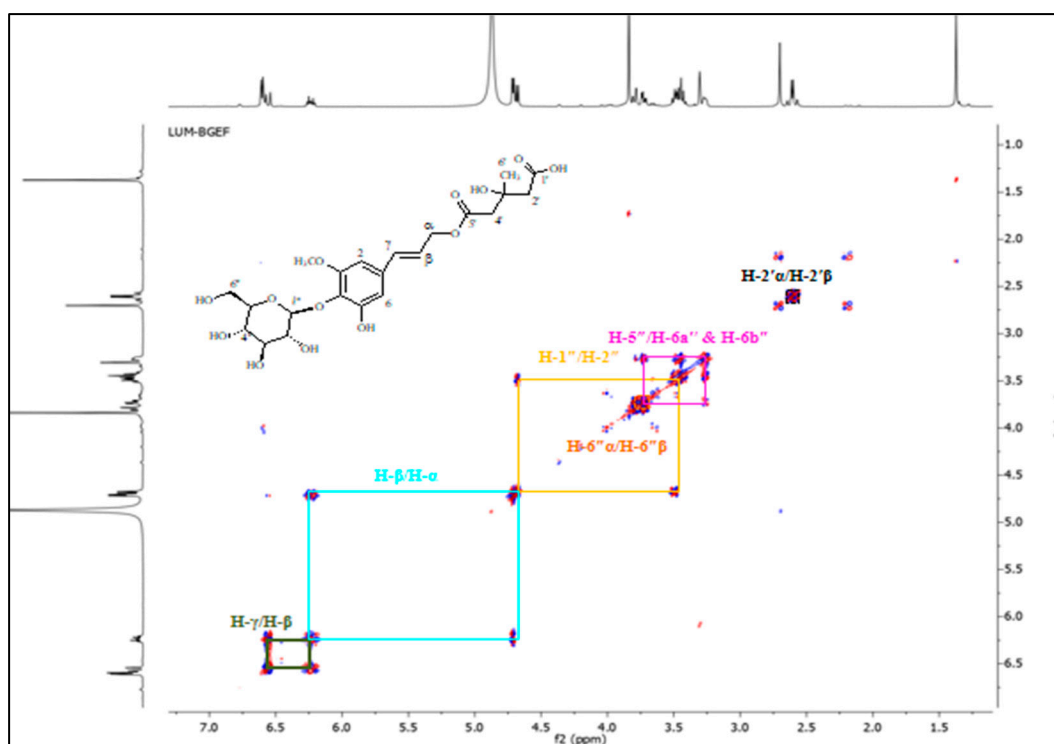

Figure S18. gDQCOSY spectrum of compound 4 (CD<sub>3</sub>OD, 500 MHz)

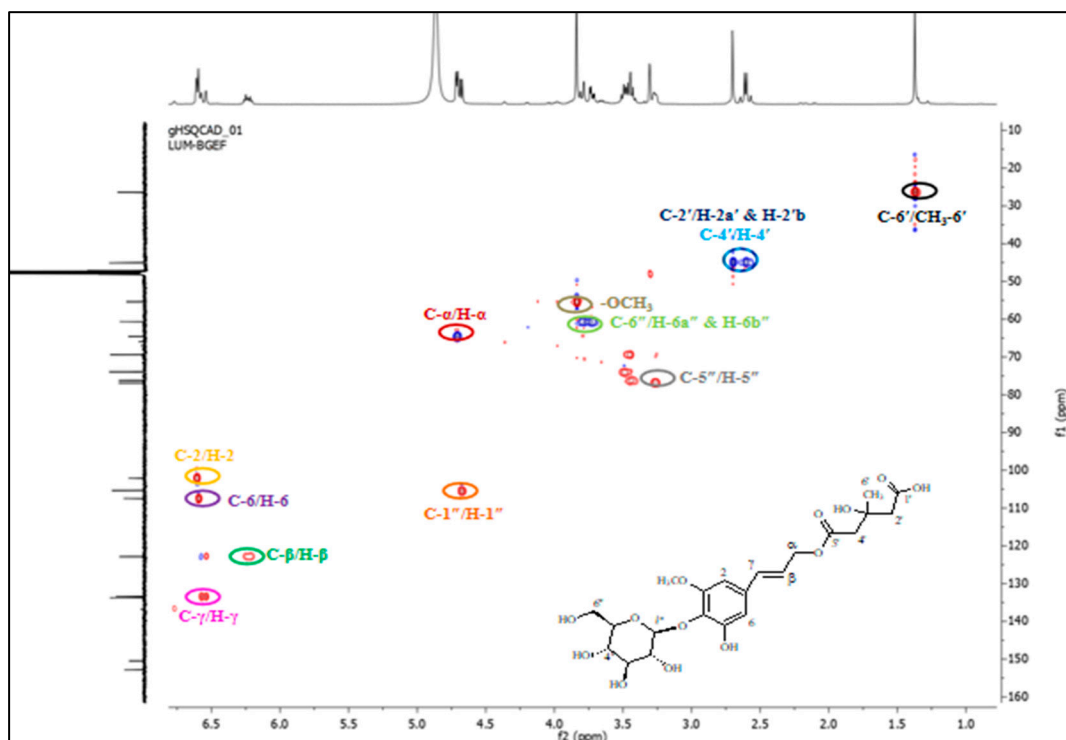

Figure S19. gHSQCAD spectrum of compound 4 (CD<sub>3</sub>OD, 500 MHz)

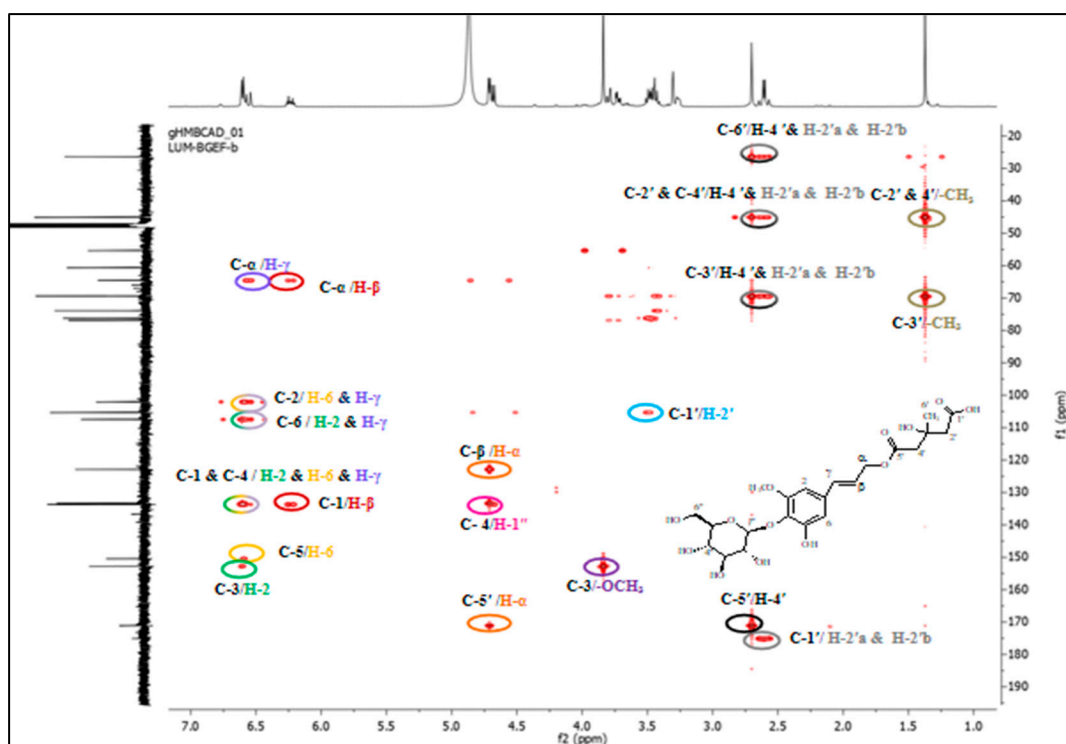

Figure S20. gHMBCAD spectrum of compound 4 (CD<sub>3</sub>OD, 500 MHz)

**Table S5.**  $^1\text{H}$  and  $^{13}\text{C}$  NMR of compound **5** ( $\text{CD}_3\text{OD}$ , 500 MHz)

| No  | $\delta_{\text{C}}$ | Type C        | $\delta_{\text{H}}$ | H | (Hz)             |
|-----|---------------------|---------------|---------------------|---|------------------|
| 1   | 79.4                | C             | -                   | - | -                |
| 2   | 36.8                | $\text{CH}_2$ | 2.14-2.26           | 2 | o.s              |
| 3   | 72.3                | CH            | 4.13                | 1 | t (J=3.5)        |
| 4   | 70.1                | CH            | 3.72                | 1 | o.s              |
| 5   | 69.8                | CH            | 5.26                | 1 | ddd (J=8.5, 2.0) |
| 6   | 37.6                | $\text{CH}_2$ | 2.14-2.26           | 2 | o.s              |
| 7   | 175.8               | C             | -                   | - | -                |
| 1'  | 126.4               | C             | -                   | - | -                |
| 2'  | 113.8               | CH            | 7.03                | 1 | s                |
| 3'  | 145.7               | C             | -                   | - | -                |
| 4'  | 147.2               | C             | -                   | - | -                |
| 5'  | 114.1               | CH            | 6.78                | 1 | d (J=8.0)        |
| 6'  | 122.5               | CH            | 6.94                | 1 | dd (J=8.0, 2.0)  |
| 7'  | 145.7               | CH            | 7.52                | 1 | d (J=15.5)       |
| 8'  | 115.1               | CH            | 6.21                | 1 | d (J=15.5)       |
| 9'  | 167.3               | C             | -                   | - | -                |
| 1'' | 51.8                | $\text{CH}_3$ | 3.69                | 3 | s                |

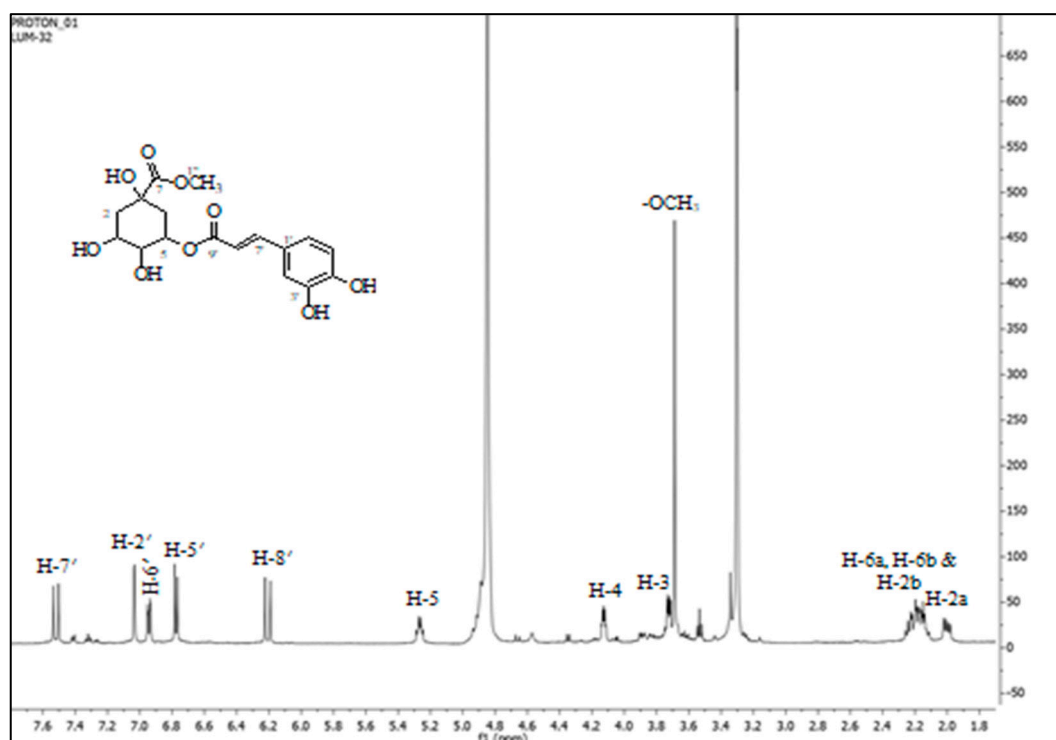

Figure S21. <sup>1</sup>H-NMR spectrum of compound 5 (CD<sub>3</sub>OD, 500 MHz)

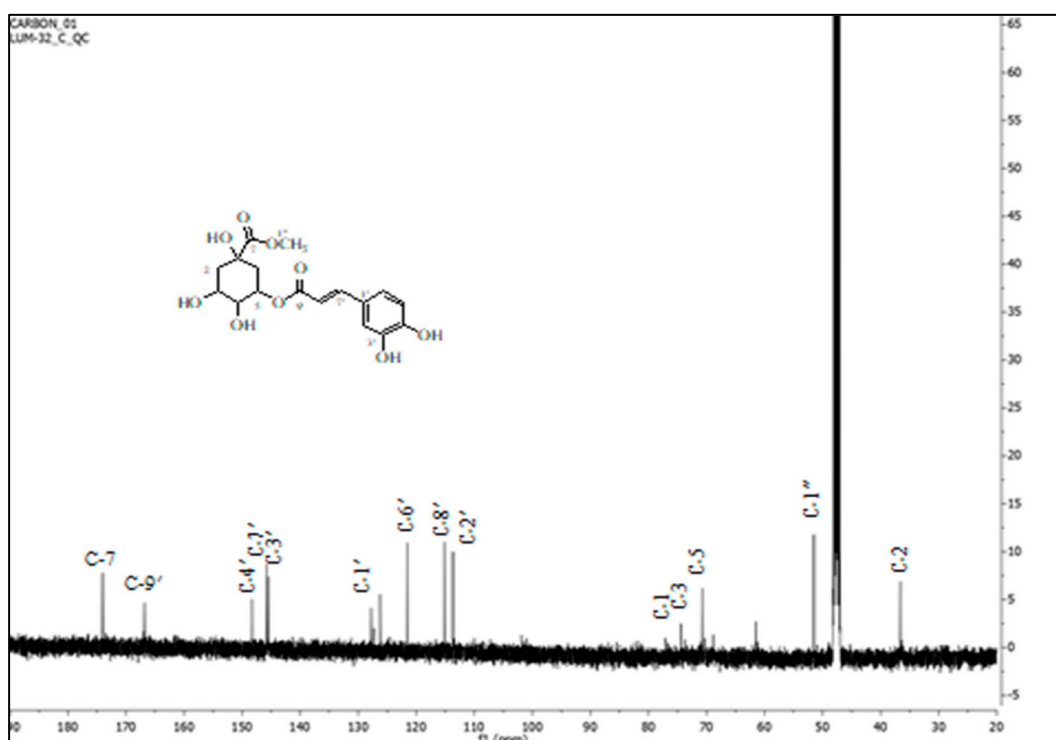

Figure S22. <sup>13</sup>C-NMR spectrum of compound 5 (CD<sub>3</sub>OD, 125 MHz)



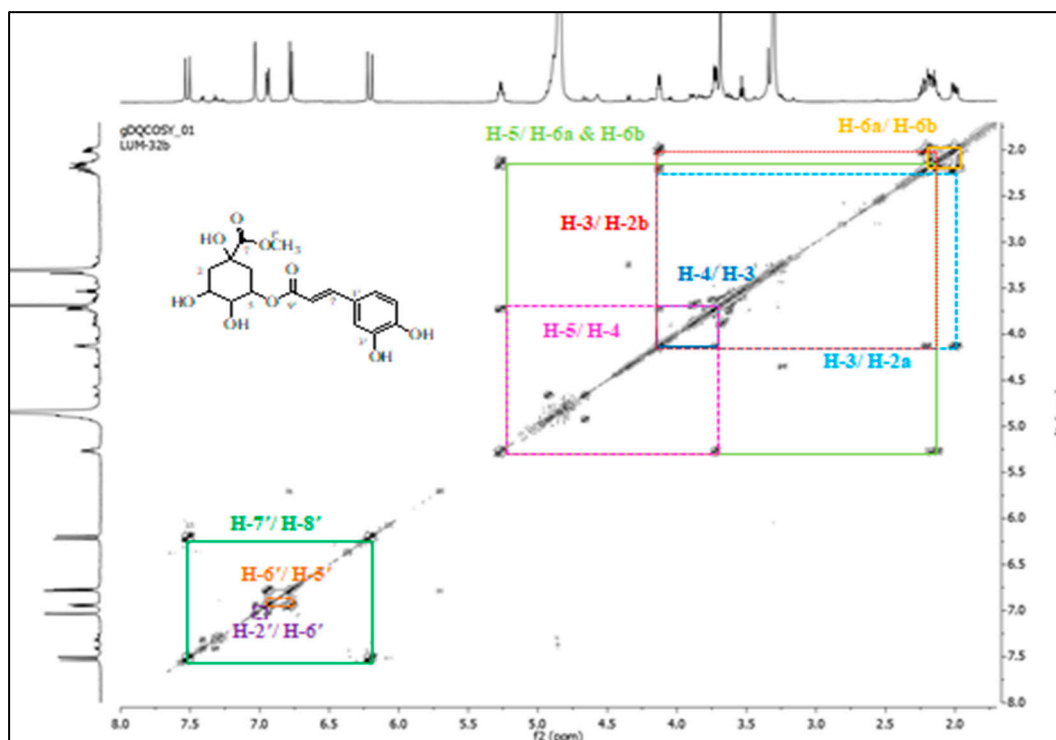

Figure S23. gDQCOSY spectrum of compound 5 (CD<sub>3</sub>OD, 500 MHz)

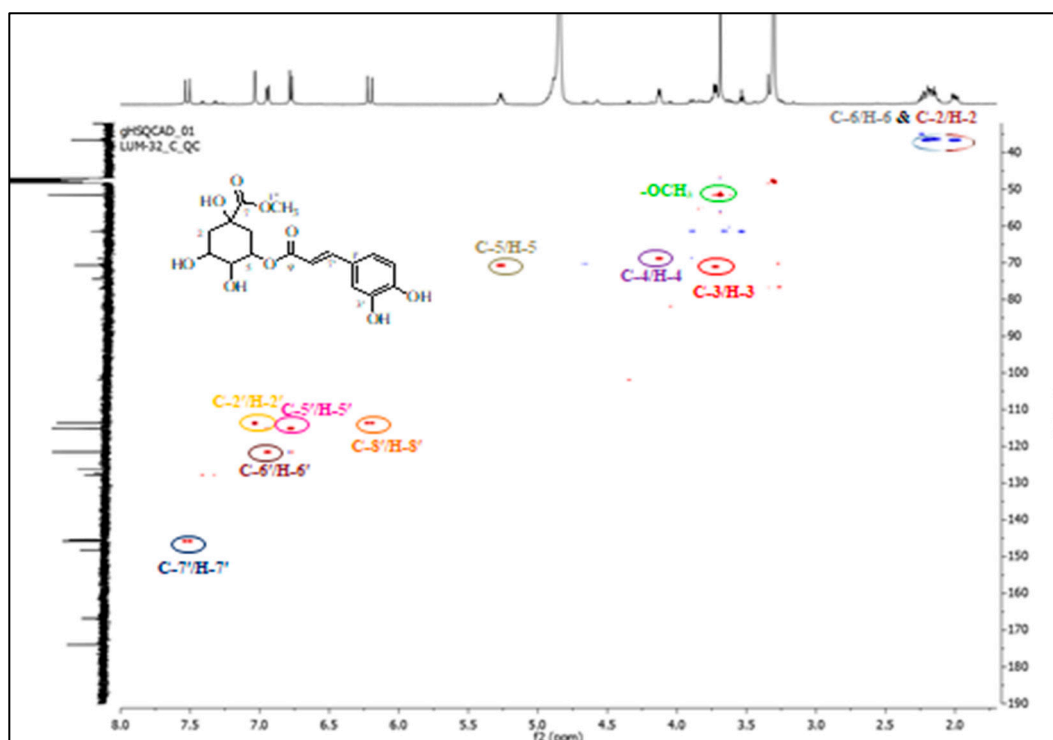

Figure S24. gHSQCAD spectrum of compound 5 (CD<sub>3</sub>OD, 500 MHz)

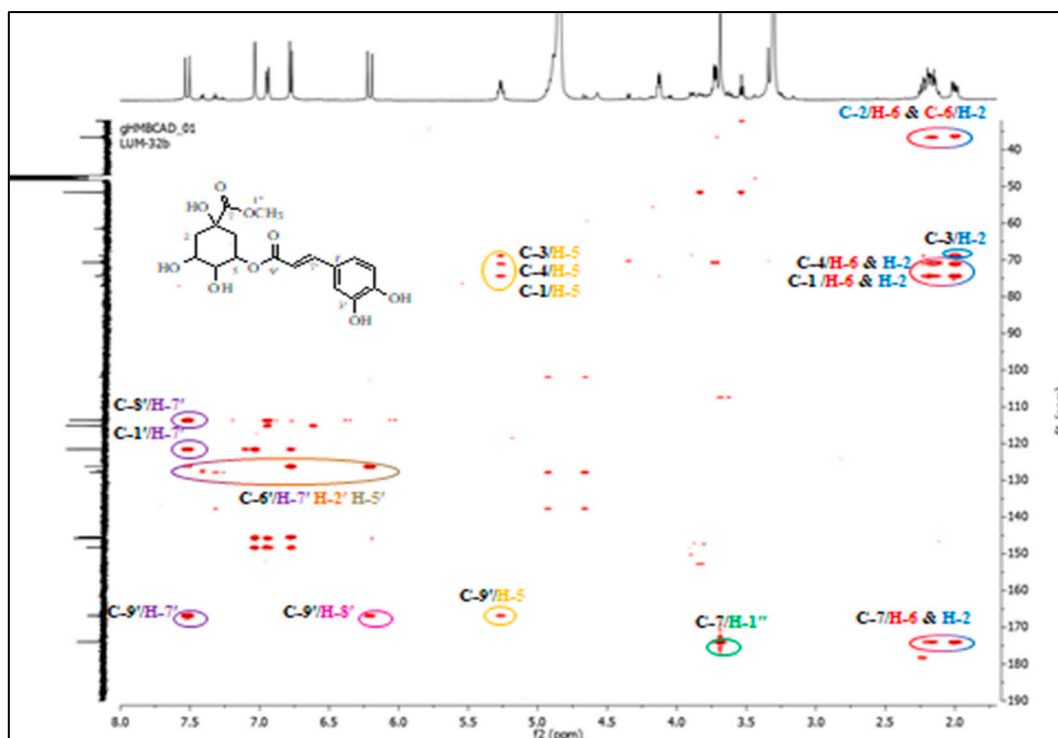

Figure S25. gHMBCAD spectrum of compound 5 (CD<sub>3</sub>OD, 500 MHz)

Table S6. <sup>1</sup>H and <sup>13</sup>C NMR of compound 6 (CD<sub>3</sub>OD, 500 MHz)

| Θέση | δ <sub>C</sub> | Τύπος<br>C      | δ <sub>H</sub> | Αριθμός<br>H | Πολλαπλότητα<br>J (Hz) |
|------|----------------|-----------------|----------------|--------------|------------------------|
| 1    | 79.4           | C               | -              | -            | -                      |
| 2    | 36.7           | CH <sub>2</sub> | 1.97-2.26      | 2            | o.s                    |
| 3    | 70.9           | CH              | 4.13           | 1            | t (J=3.5)              |
| 4    | 70.4           | CH              | 3.72           | 1            | o.s                    |
| 5    | 68.5           | CH              | 5.26           | 1            | ddd (J=8.5, 2.0)       |
| 6    | 36.6           | CH <sub>2</sub> | 1.97-2.26      | 2            | o.s                    |
| 7    | 173.6          | C               | -              | -            | -                      |
| 1'   | 126.2          | C               | -              | -            | -                      |
| 2'   | 113.6          | CH              | 7.03           | 1            | s                      |
| 3'   | 145.4          | C               | -              | -            | -                      |
| 4'   | 148.3          | C               | -              | -            | -                      |
| 5'   | 113.7          | CH              | 6.78           | 1            | d (J=8.0)              |
| 6'   | 121.5          | CH              | 6.94           | 1            | dd (J=8.0, 2.0)        |

|     |       |                 |      |   |            |
|-----|-------|-----------------|------|---|------------|
| 7'  | 145.7 | CH              | 7.52 | 1 | d (J=15.5) |
| 8'  | 115.1 | CH              | 6.21 | 1 | d (J=15.5) |
| 9'  | 166.8 | C               | -    | - | -          |
| 1'' | 64.9  | CH <sub>2</sub> | 4.11 | 2 | m          |
| 2'' | 30.2  | CH <sub>2</sub> | 1.58 | 2 | m          |
| 3'' | 18.7  | CH <sub>2</sub> | 1.35 | 2 | m          |
| 4'' | 12.6  | CH <sub>3</sub> | 0.90 | 3 | t (J=7.0)  |

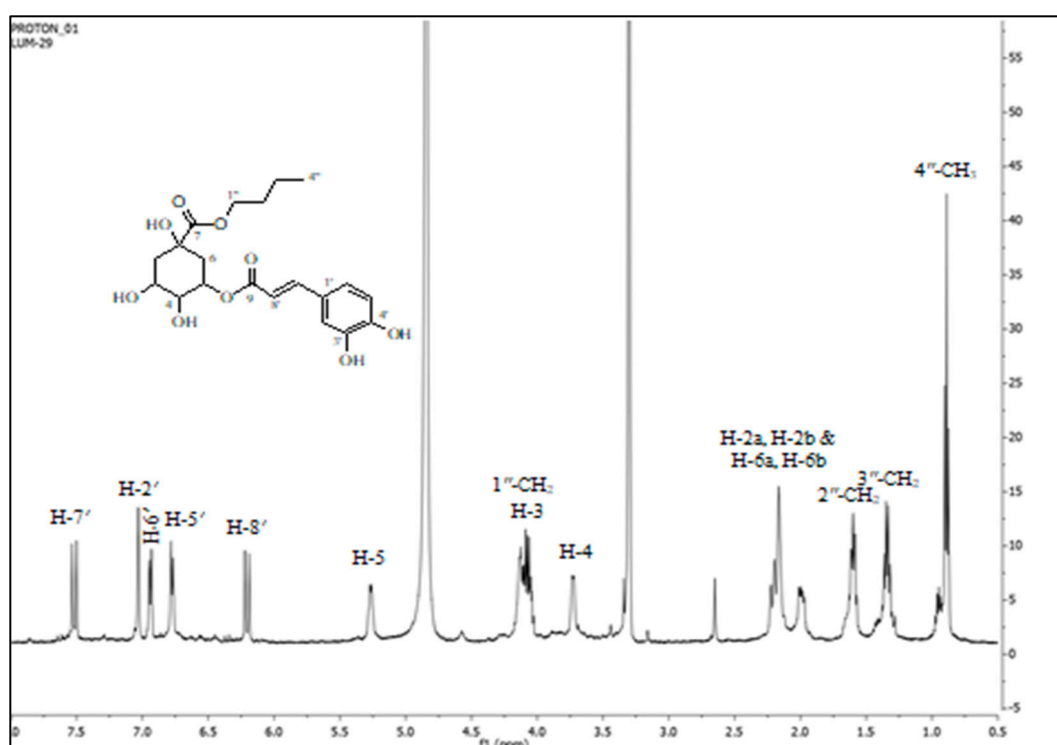

Figure S26. <sup>1</sup>H-NMR spectrum of compound 6 (CD<sub>3</sub>OD, 500 MHz)

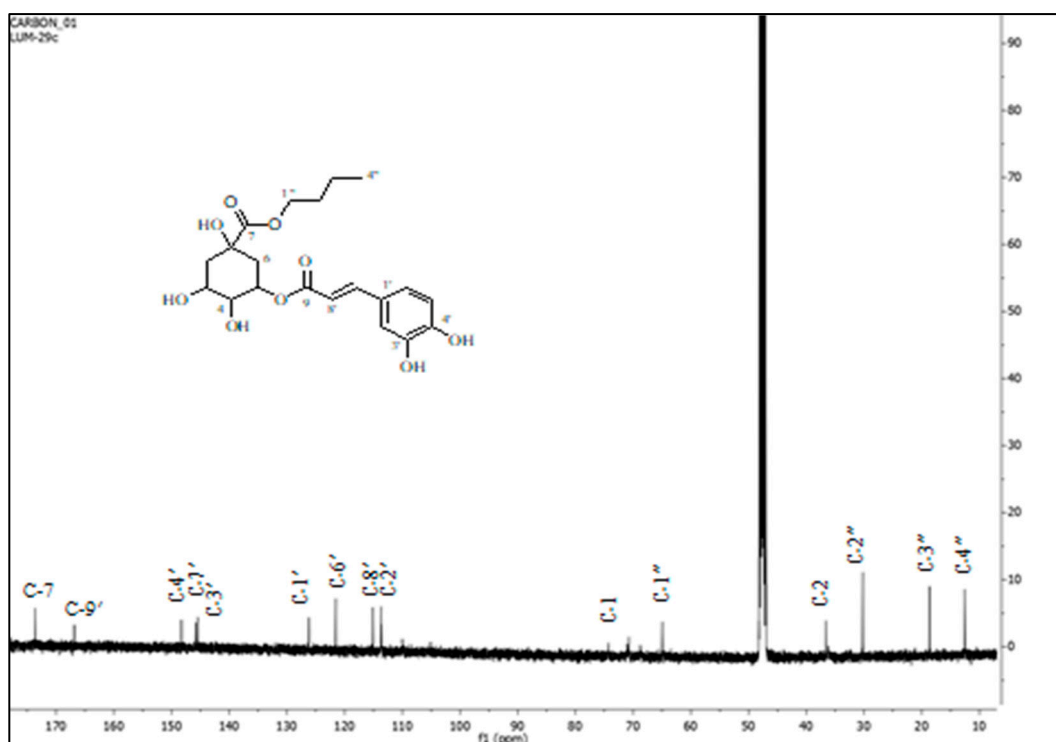

Figure S27.  $^{13}\text{C}$ -NMR spectrum of compound **6** ( $\text{CD}_3\text{OD}$ , 125 MHz)

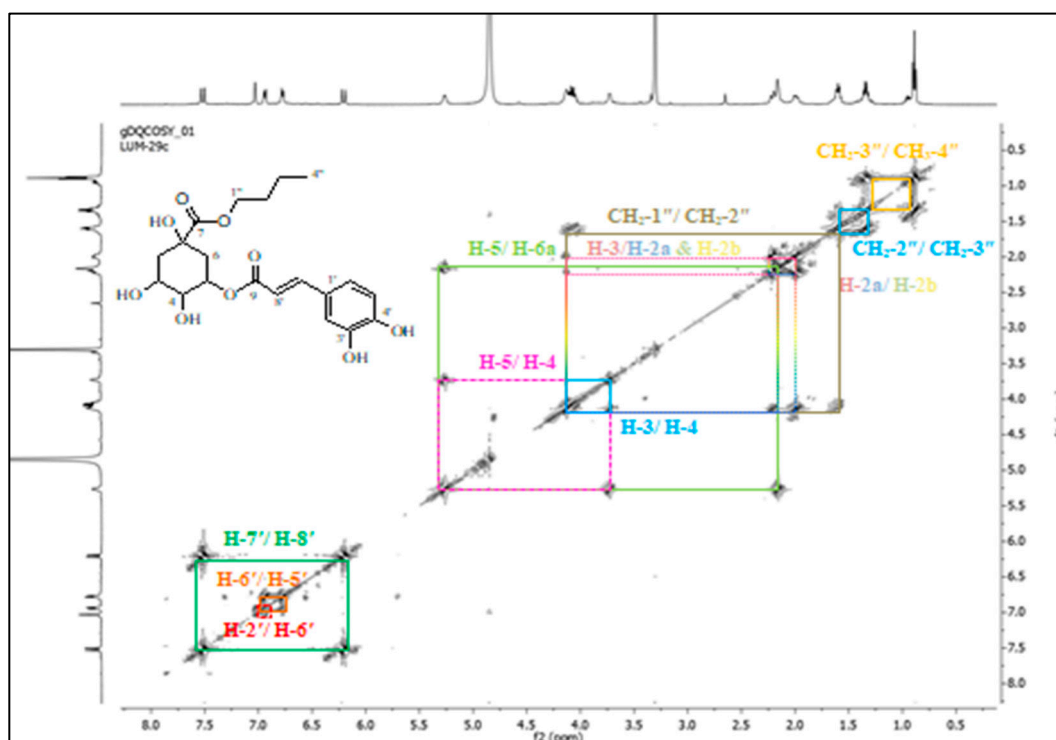

Figure S28. gDQCOSY spectrum of compound **6** ( $\text{CD}_3\text{OD}$ , 500 MHz)

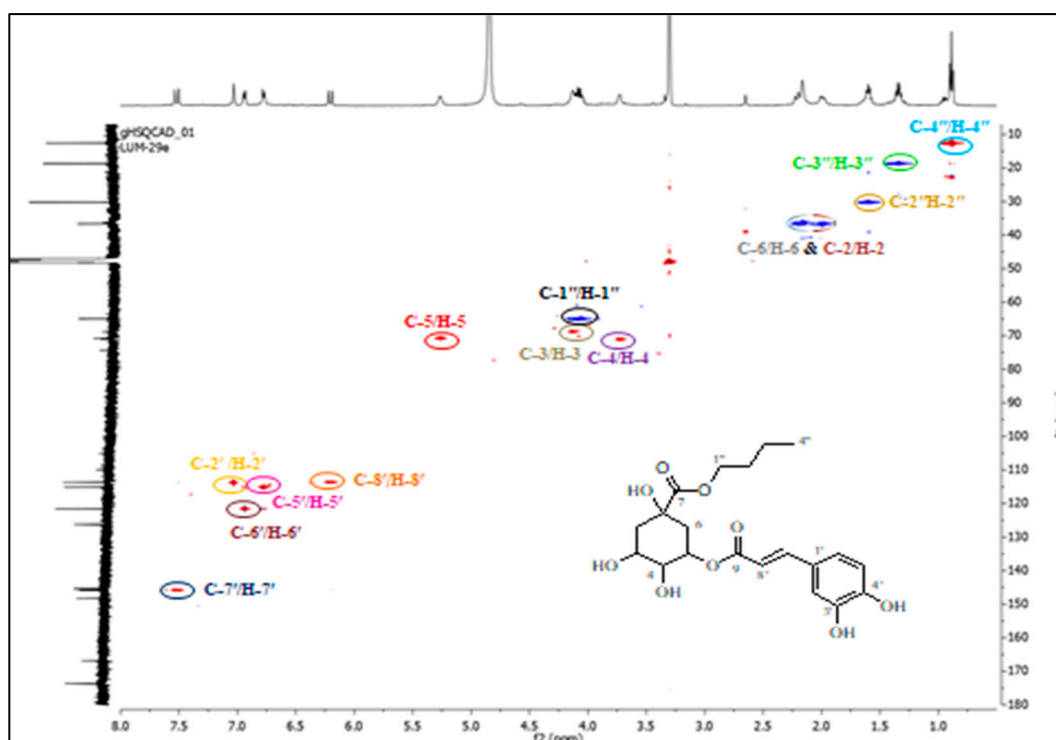

Figure S29. gHSQCAD spectrum of compound 6 (CD<sub>3</sub>OD, 500 MHz)

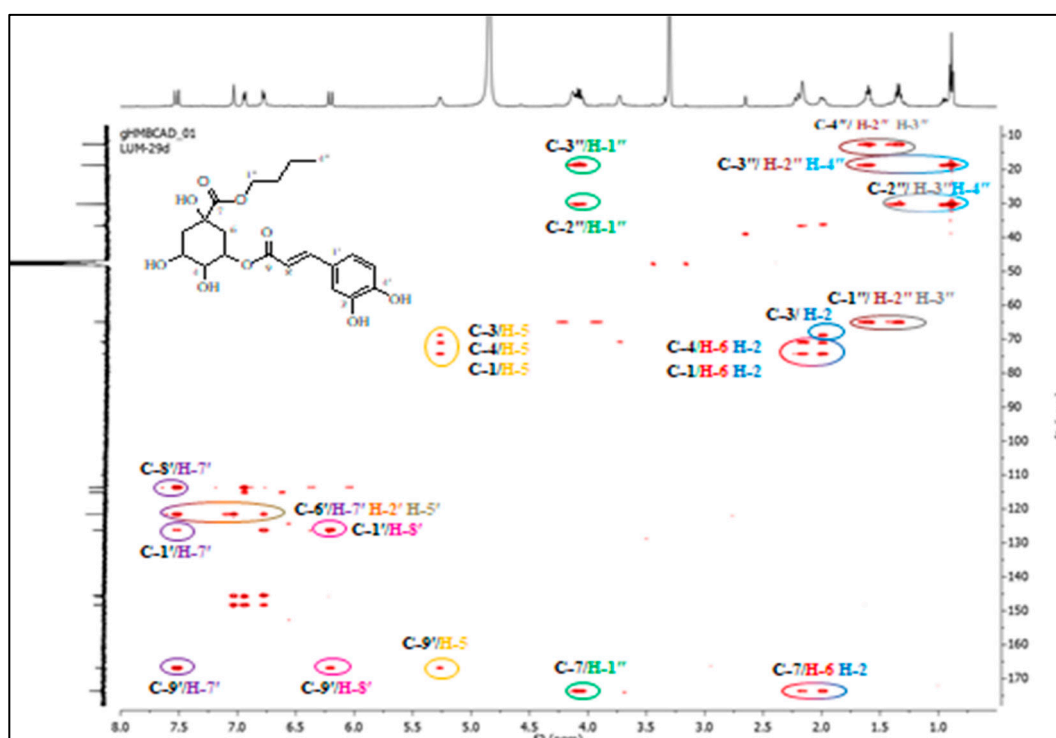

Figure S30. gHMBCAD spectrum of compound 6 (CD<sub>3</sub>OD, 500 MHz)

Table S7. <sup>1</sup>H and <sup>13</sup>C NMR of compound 7 (CD<sub>3</sub>OD, 500 MHz)

| No                    | $\delta_C$ | Type C          | $\delta_H$ | H | J (Hz)    |
|-----------------------|------------|-----------------|------------|---|-----------|
| 2                     | 158.0      | C               | -          | - | -         |
| 3                     | 134.1      | C               | -          | - | -         |
| 4                     | 167.7      | C=O             | -          | - | -         |
| 5                     | 160.1      | C               | -          | - | -         |
| 6                     | 98.7       | CH              | 6.20       | 1 | s         |
| 7                     | 164.8      | C               | -          | - | -         |
| 8                     | 93.6       | CH              | 6.39       | 1 | s         |
| 9                     | 157.1      | C               | -          | - | -         |
| 10                    | 104.2      | C               | -          | - | -         |
| 1'                    | 121.3      | C               | -          | - | -         |
| 2'                    | 131.0      | CH              | 8.05       | 1 | d (J=8.0) |
| 3'                    | 114.7      | CH              | 6.89       | 1 | d (J=8.0) |
| 4'                    | 158.0      | C               | -          | - | -         |
| 5'                    | 114.7      | CH              | 6.89       | 1 | d (J=8.0) |
| 6'                    | 131.0      | CH              | 8.05       | 1 | d (J=8.0) |
| 1''                   | 103.2      | CH              | 5.09       | 1 | d (J=7.0) |
| 2''                   | 74.3       | CH              | 3.41       | 1 | o.s       |
| 3''                   | 76.7       | CH              | 3.38-3.70  | 1 | o.s       |
| 4''                   | 70.0       | CH              | 3.38-3.70  | 1 | o.s       |
| 5''                   | 75.7       | CH              | 3.38-3.70  | 1 | o.s       |
| 6''a                  | 67.2       | CH <sub>2</sub> | 3.80       | 1 | o.s       |
| 6''b                  |            |                 | 3.80       | 1 | o.s       |
| 1'''                  | 101.0      | CH              | 4.51       | 1 | s         |
| 2'''                  | 70.9       | CH              | 3.38-3.70  | 1 | o.s       |
| 3'''                  | 70.6       | CH              | 3.38-3.70  | 1 | o.s       |
| 4'''                  | 72.5       | CH              | 3.38-3.70  | 1 | o.s       |
| 5'''                  | 68.3       | CH              | 3.46       | 1 | o.s       |
| CH <sub>3</sub> -6''' | 16.5       | CH              | 1.12       | 3 | d (J=6.0) |

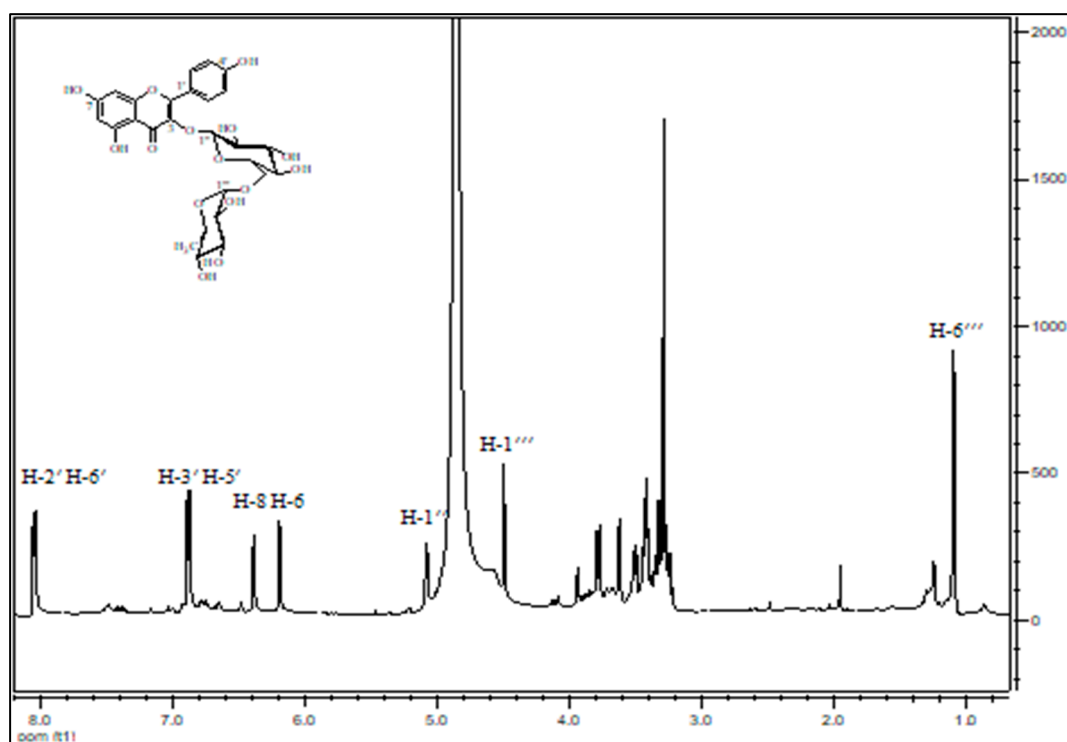

Figure S31.  $^1\text{H}$ -NMR spectrum of compound 7 ( $\text{CD}_3\text{OD}$ , 500 MHz)

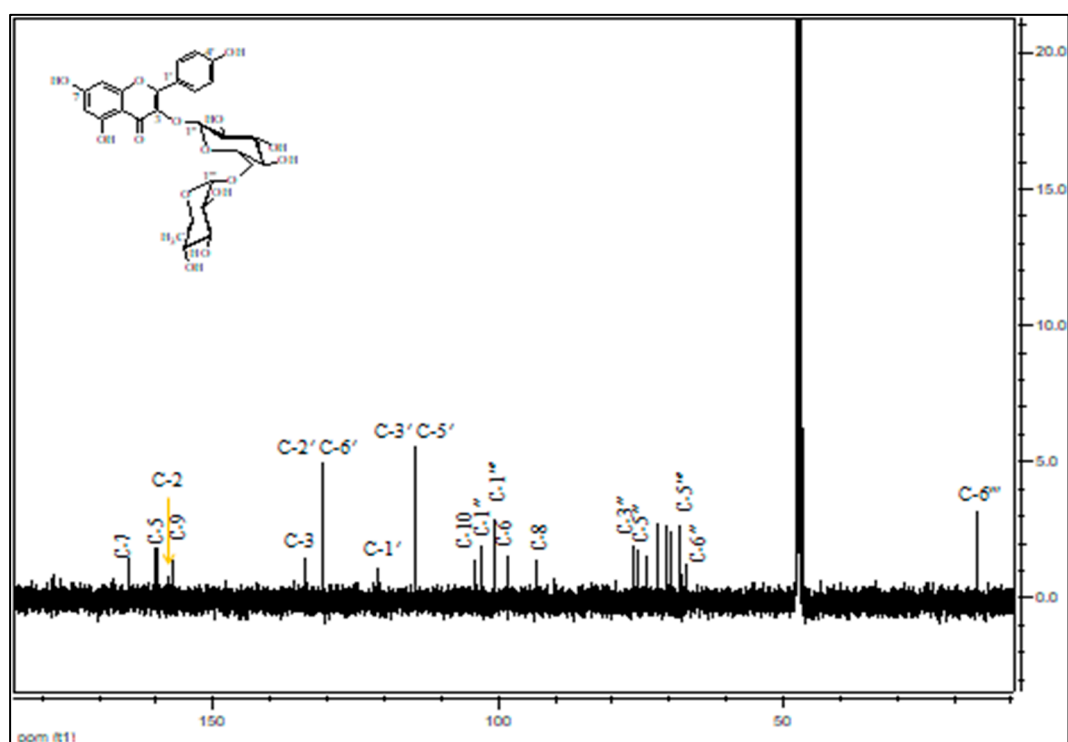

Figure S32.  $^{13}\text{C}$ -NMR spectrum of compound 7 ( $\text{CD}_3\text{OD}$ , 125 MHz)

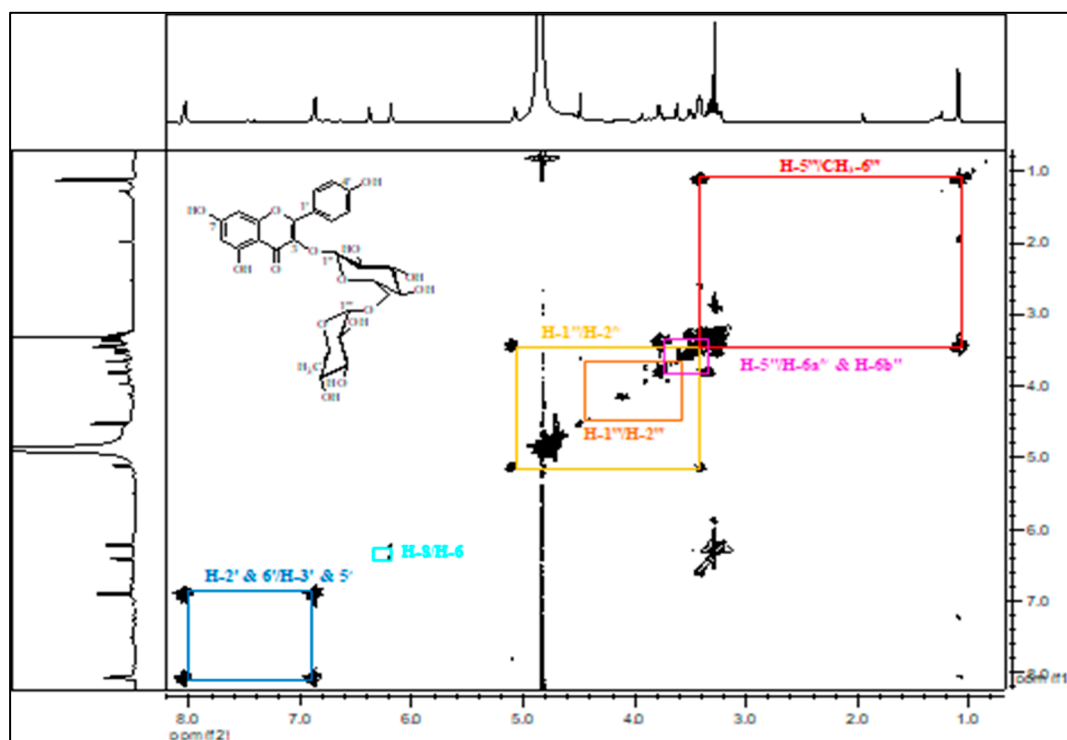

Figure S33. gDQCOSY spectrum of compound 7 (CD<sub>3</sub>OD, 500 MHz)

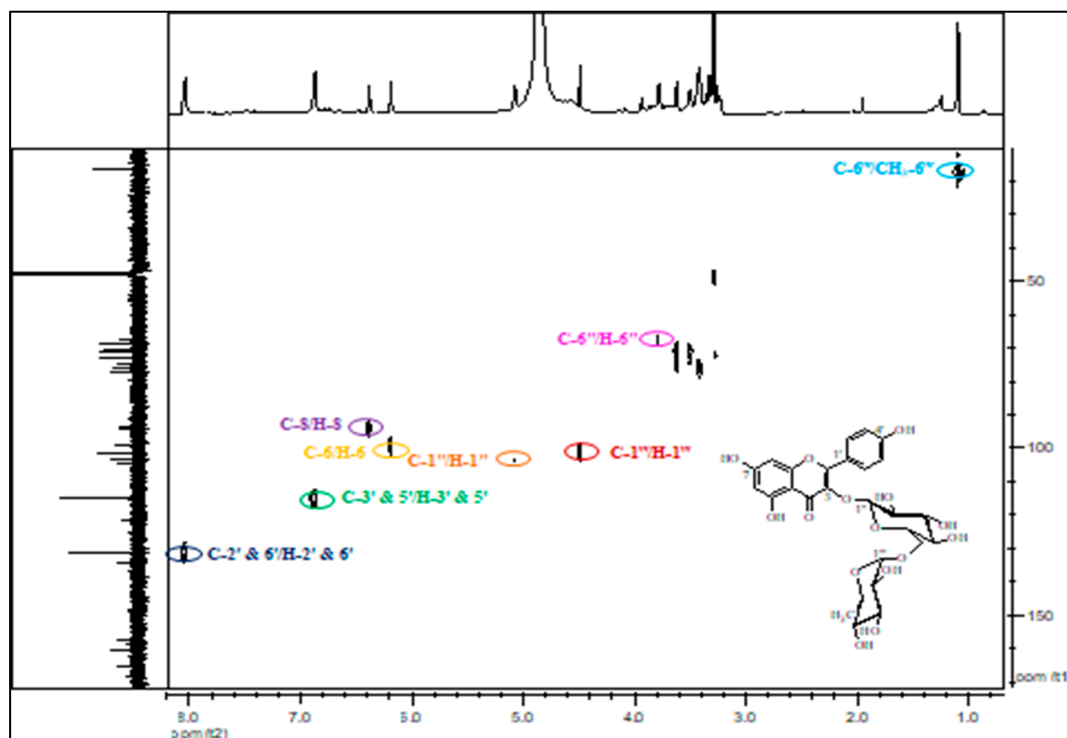

Figure S34. gHSQCAD spectrum of compound 7 (CD<sub>3</sub>OD, 500 MHz)



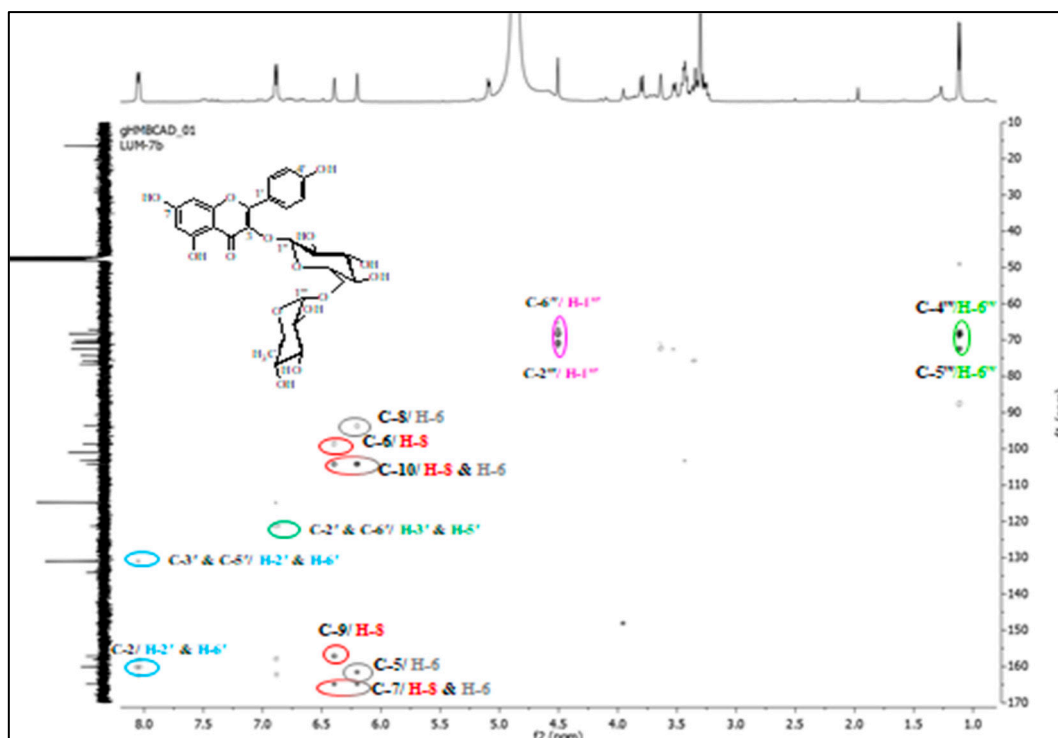

Figure S35. gHMBCAD spectrum of compound 7 (CD<sub>3</sub>OD, 500 MHz)

Table S8. <sup>1</sup>H and <sup>13</sup>C NMR of compound 8 (CD<sub>3</sub>OD, 500 MHz)

| No | δ <sub>C</sub> | Type C | δ <sub>H</sub> | H | J (Hz)    |
|----|----------------|--------|----------------|---|-----------|
| 2  | 158.0          | C      | -              | - | -         |
| 3  | 134.2          | C      | -              | - | -         |
| 4  | 177.9          | C=O    | -              | - | -         |
| 5  | 161.4          | C      | -              | - | -         |
| 6  | 98.6           | CH     | 6.21           | 1 | s         |
| 7  | 164.8          | C      | -              | - | -         |
| 8  | 93.5           | CH     | 6.40           | 1 | s         |
| 9  | 157.1          | C      | -              | - | -         |
| 10 | 104.2          | C      | -              | - | -         |
| 1' | 121.7          | C      | -              | - | -         |
| 2' | 116.3          | CH     | 7.66           | 1 | s         |
| 3' | 144.4          | C      | -              | - | -         |
| 4' | 148.4          | C      | -              | - | -         |
| 5' | 114.6          | CH     | 6.87           | 1 | d (J=7.5) |

|                       |       |                 |           |   |            |
|-----------------------|-------|-----------------|-----------|---|------------|
| 6'                    | 122.2 | CH              | 7.63      | 1 | dd (J=7.5) |
| 1''                   | 103.4 | CH              | 5.10      | 1 | d (J=7.0)  |
| 2''                   | 74.2  | CH              | 3.47      | 1 | o.s        |
| 3''                   | 76.7  | CH              | 3.44      | 1 | o.s        |
| 4''                   | 72.5  | CH              | 3.25-3.80 | 1 | o.s        |
| 5''                   | 75.8  | CH              | 3.25-3.80 | 1 | o.s        |
| 6''a                  | 67.2  | CH <sub>2</sub> | 3.76      | 1 | o.s        |
| 6''b                  |       |                 | 3.38      | 1 | o.s        |
| 1'''                  | 101.0 | CH              | 4.51      | 1 | s          |
| 2'''                  | 70.0  | CH              | 3.64      | 1 | o.s        |
| 3'''                  | 70.7  | CH              | 3.55      | 1 | o.s        |
| 4'''                  | 70.8  | CH              | 3.25-3.80 | 1 | o.s        |
| 5'''                  | 68.5  | CH              | 3.43      | 1 | o.s        |
| CH <sub>3</sub> -6''' | 16.5  | CH              | 1.11      | 3 | d (J=6.0)  |

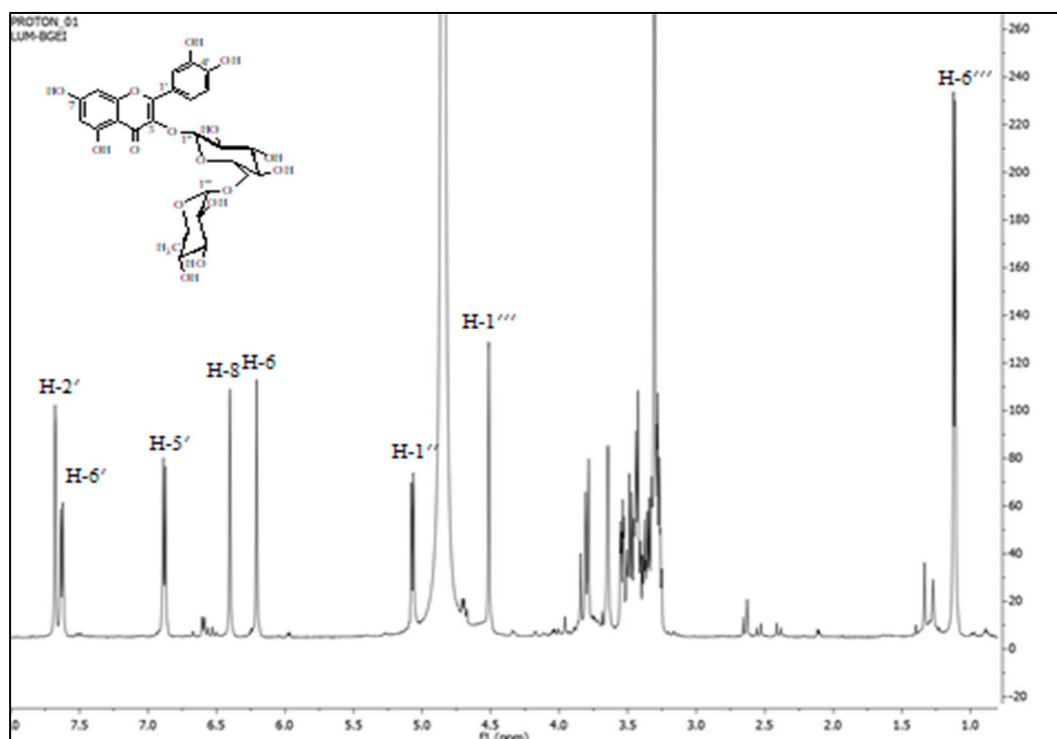

Figure S36. <sup>1</sup>H-NMR spectrum of compound 8 (CD<sub>3</sub>OD, 500 MHz)

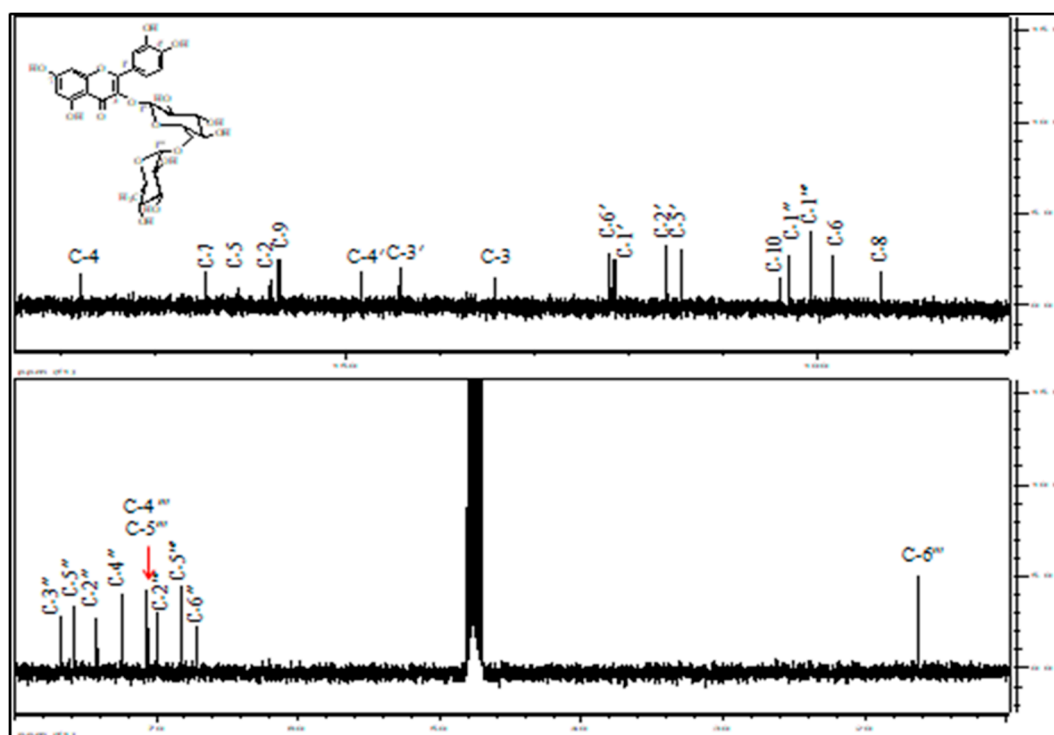

Figure S37.  $^{13}\text{C}$ -NMR spectrum of compound **8** ( $\text{CD}_3\text{OD}$ , 125 MHz)

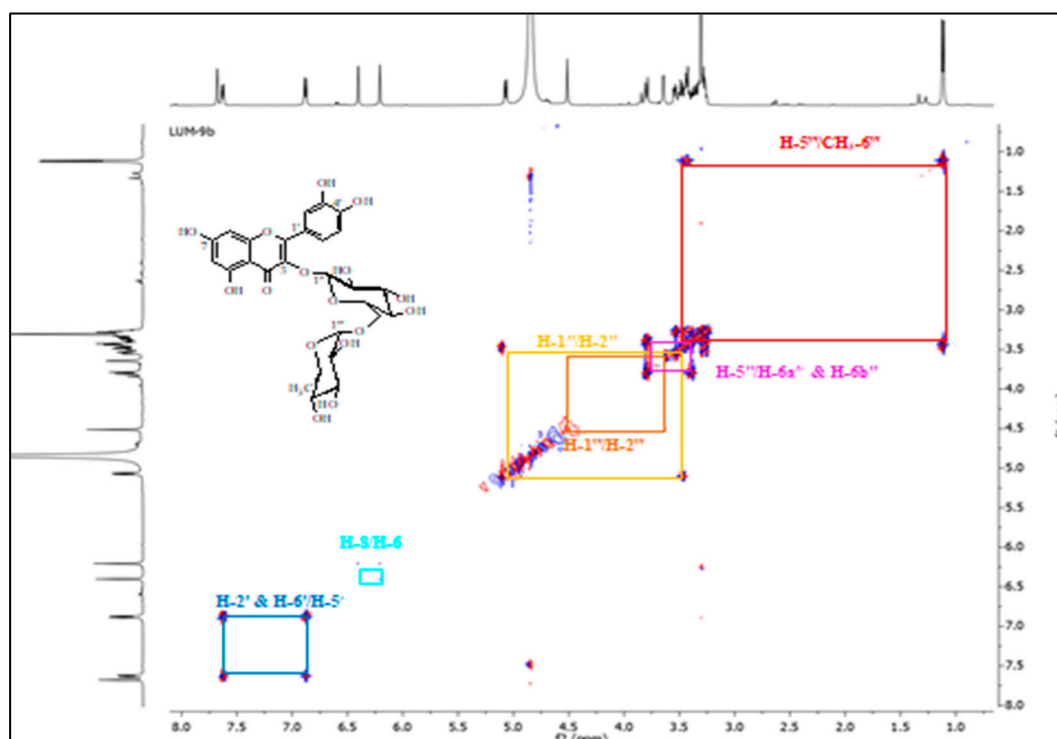

Figure S38. gDQCOSY spectrum of compound **8** ( $\text{CD}_3\text{OD}$ , 500 MHz)

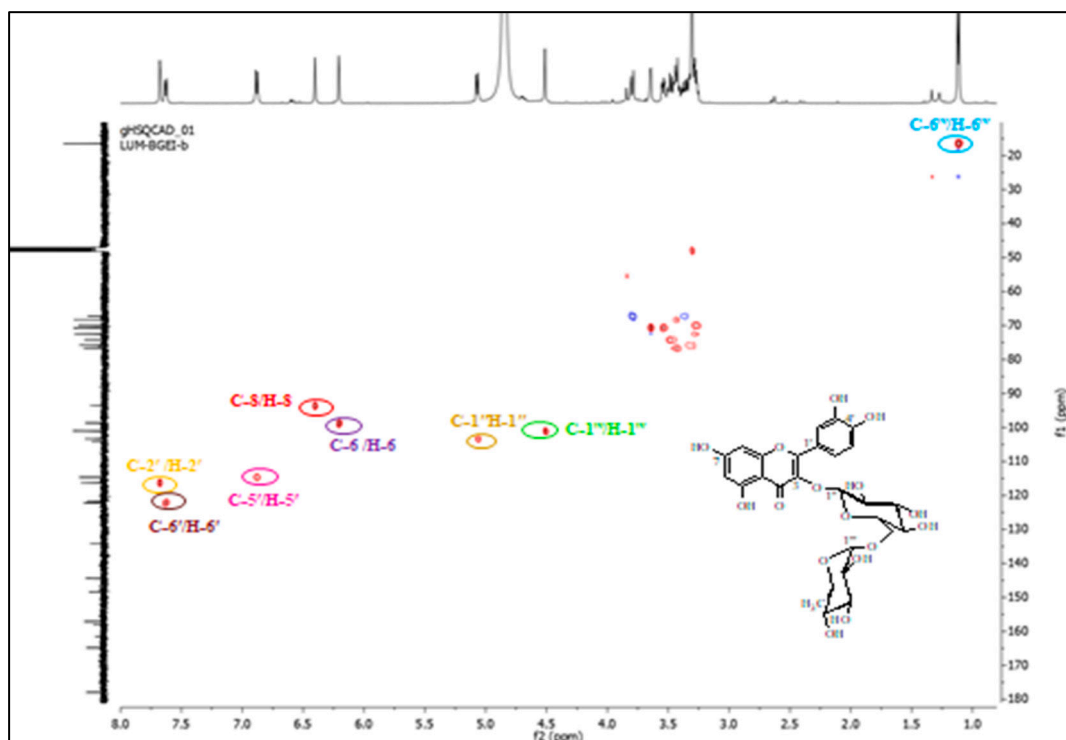

Figure S39. gHSQCAD spectrum of compound **8** (CD<sub>3</sub>OD, 500 MHz)

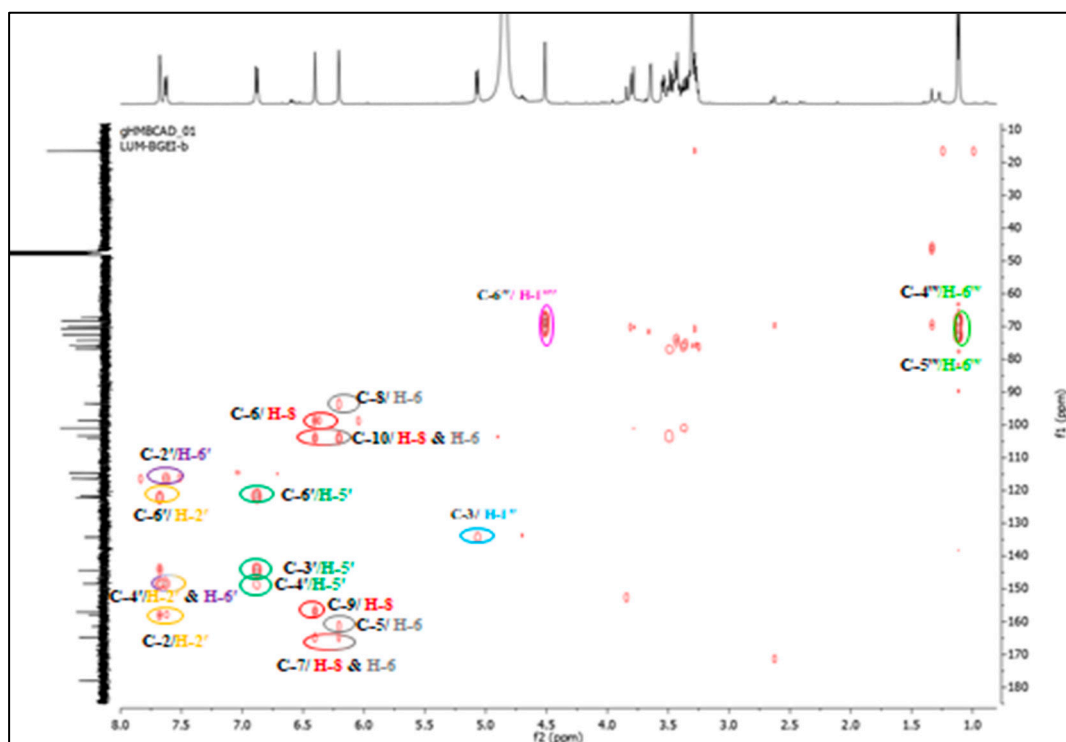

Figure S40. gHMBCAD spectrum of compound **8** (CD<sub>3</sub>OD, 500 MHz)

**Table S9.**  $^1\text{H}$  and  $^{13}\text{C}$  NMR of compound **9** ( $\text{CD}_3\text{OD}$ , 500 MHz)

| No   | $\delta_{\text{C}}$ | Type C              | $\delta_{\text{H}}$ | H | J (Hz)           |
|------|---------------------|---------------------|---------------------|---|------------------|
| 1    | 39.3                | C                   | -                   | - | -                |
| 2a   | 43.1                | $\text{CH}_2$       | 1.74                | 1 | o.s              |
| 2b   |                     |                     | 1.59                | 1 | o.s              |
| 3    | 71.9                | O-CH                | 4.21                | 1 | o.s              |
| 4a   | 40.9                | $\text{CH}_2$       | 1.94                | 1 | o.s              |
| 4b   |                     |                     | 1.75                | 1 | o.s              |
| 5    | 75.7                | C-O                 | -                   | - | -                |
| 6    | 73.7                | C-O                 | -                   | - | -                |
| 7    | 129.5               | $\text{CH}=\text{}$ | 6.06                | 1 | d (J=16.0)       |
| 8    | 134.7               | $\text{CH}=\text{}$ | 5.78                | 1 | dd (J=16.0, 6.5) |
| 9    | 68.1                | O-CH                | 4.35                | 1 | m                |
| 10   | 22.7                | $\text{CH}_3$       | 1.27                | 3 | d (J=6.5)        |
| 11   | 26.1                | $\text{CH}_3$       | 0.88                | 3 | s                |
| 12   | 24.8                | $\text{CH}_3$       | 1.22                | 3 | s                |
| 13   | 25.7                | $\text{CH}_3$       | 1.11                | 3 | s                |
| 1'   | 100.8               | CH                  | 4.40                | 1 | d (J=7.5)        |
| 2'   | 76.3                | CH                  | 3.25                | 1 | s                |
| 3'   | 76.7                | CH                  | 3.35                | 1 | o.s              |
| 4'   | 77.8                | CH                  | 3.32                | 1 | o.s              |
| 5'   | 70.2                | CH                  | 3.29                | 1 | o.s              |
| 6''a | 61.4                | $\text{CH}_2$       | 3.85                | 1 | o.s              |
| 6''b |                     |                     | 3.67                | 1 | o.s              |

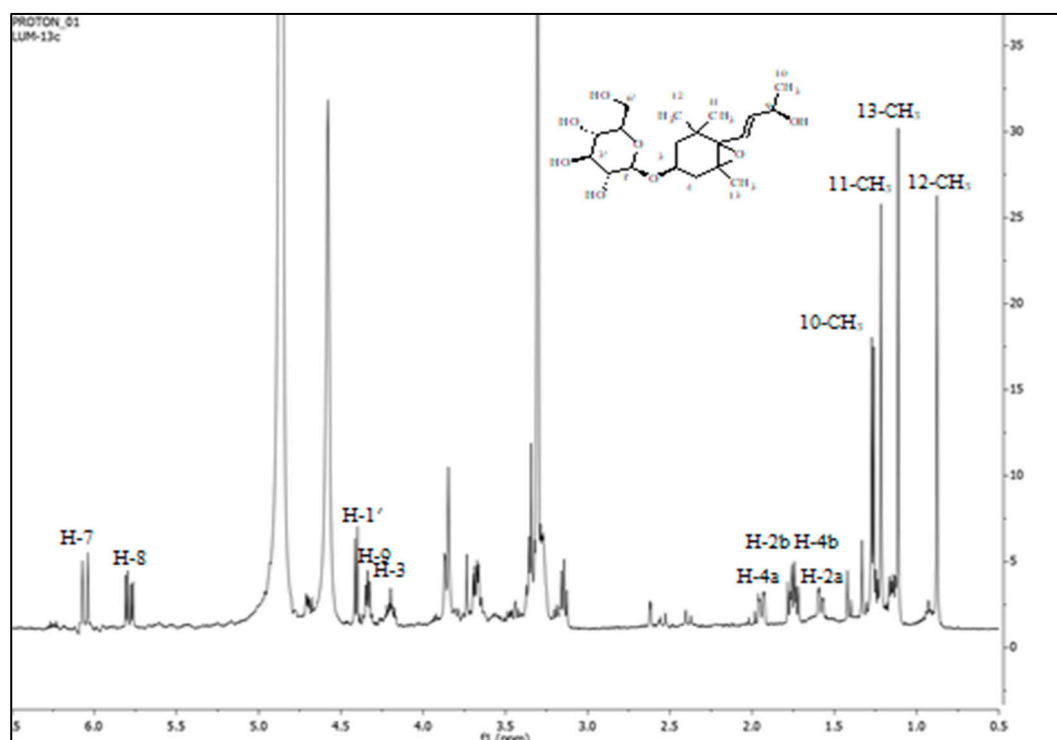

Figure S41. <sup>1</sup>H-NMR spectrum of compound 9 (CD<sub>3</sub>OD, 500 MHz)

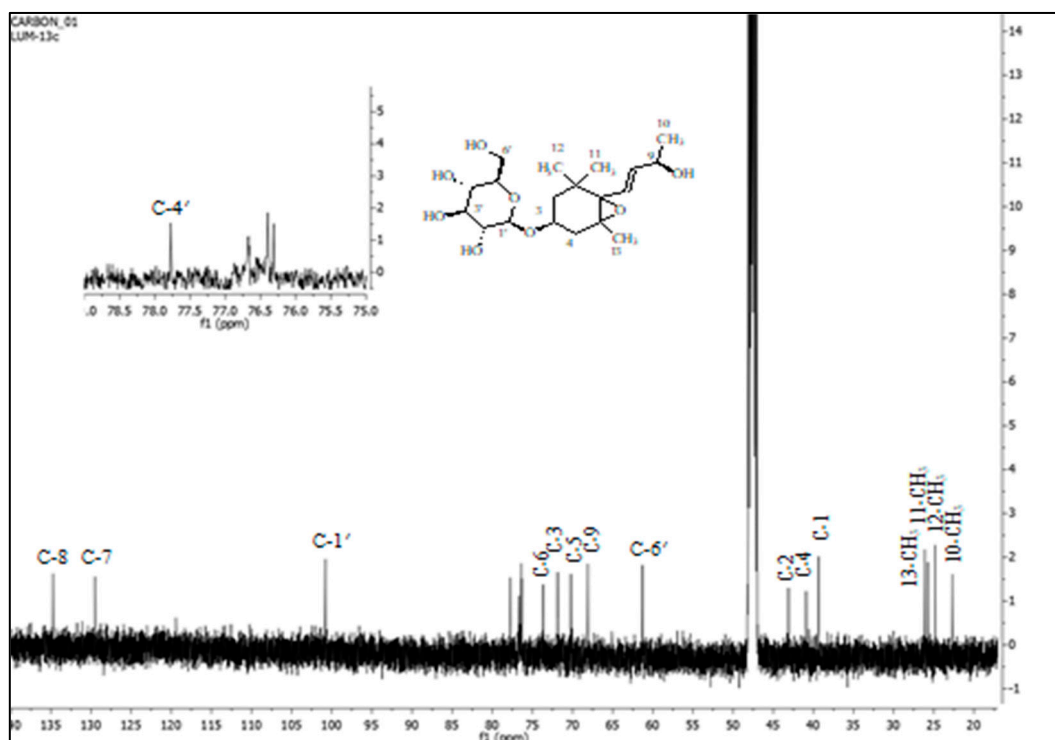

Figure S42. <sup>13</sup>C-NMR spectrum of compound 9 (CD<sub>3</sub>OD, 125 MHz)

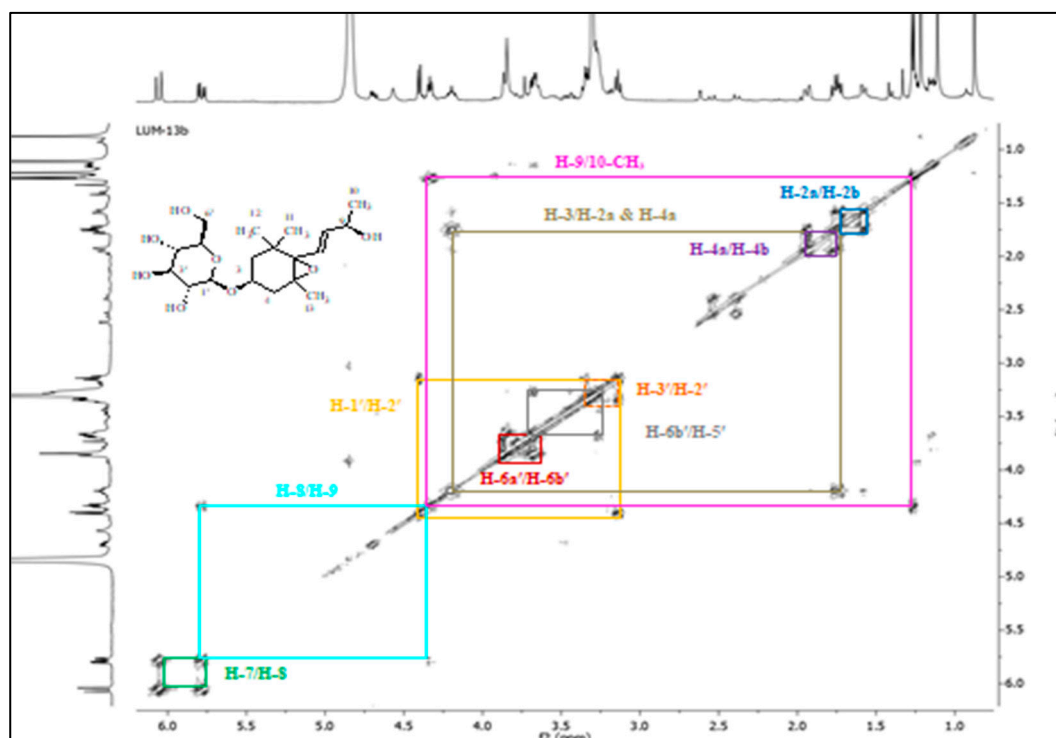

Figure S43. gDQCOSY spectrum of compound 9 (CD<sub>3</sub>OD, 500 MHz)

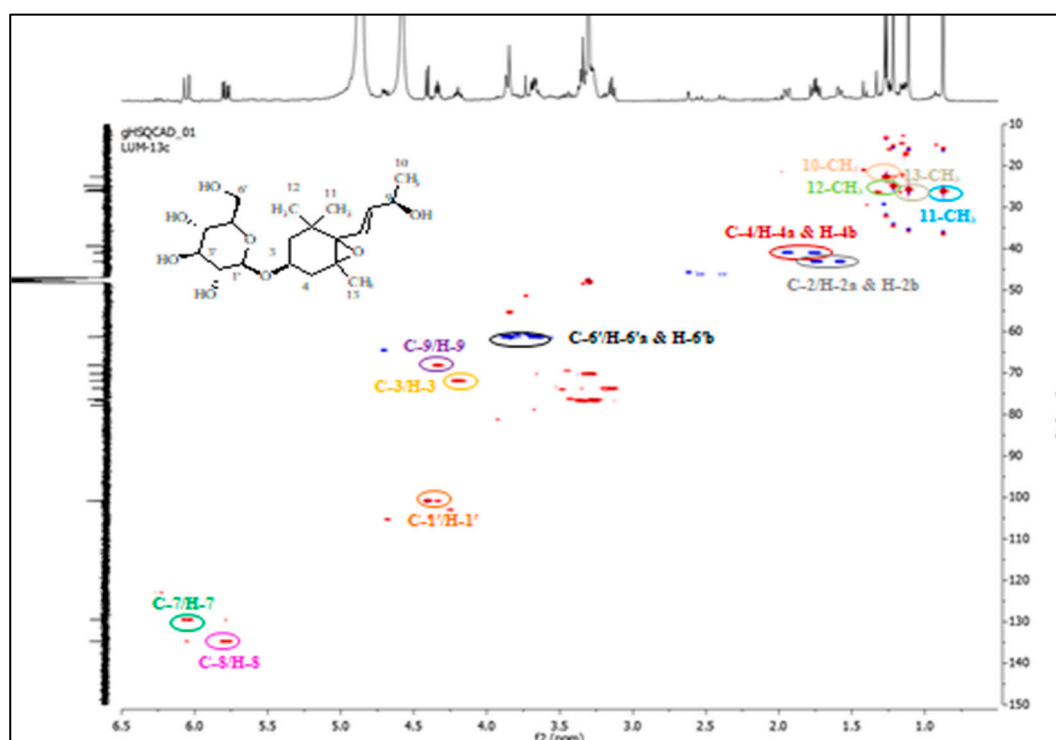

Figure S44. gHSQCAD spectrum of compound 9 (CD<sub>3</sub>OD, 500 MHz)

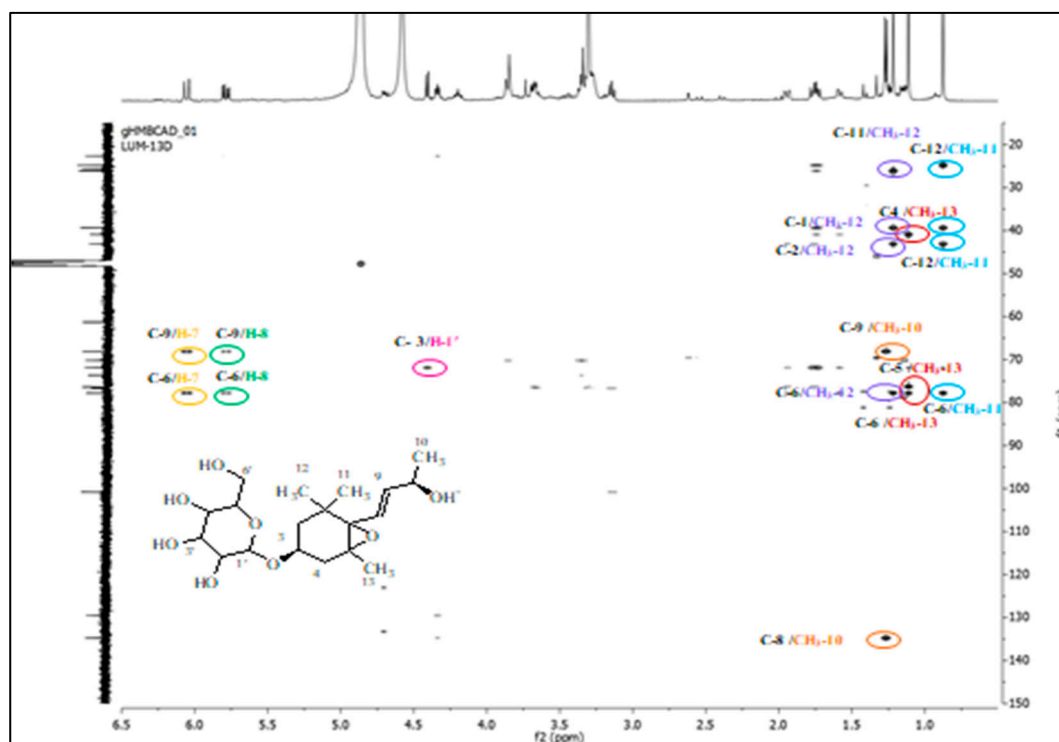

Figure S45. gHMBCAD spectrum of compound 9 (CD<sub>3</sub>OD, 500 MHz)
